# Supplementary material for: Quantifying the causal impact of biological risk factors on healthcare costs
Source: PubMed Central journal article supplement (PMC10499912; doi:10.1038/s41467-023-41394-4), 2023-09-13
Supplement: 41467_2023_41394_MOESM1_ESM.pdf [file 41467_2023_41394_MOESM1_ESM.pdf]

## Supplementary Information

### Supplementary Figures and Legends

*Supplementary Figure 1. Manhattan plot from GWAS of log-transformed annual total healthcare costs in FinnGen.*

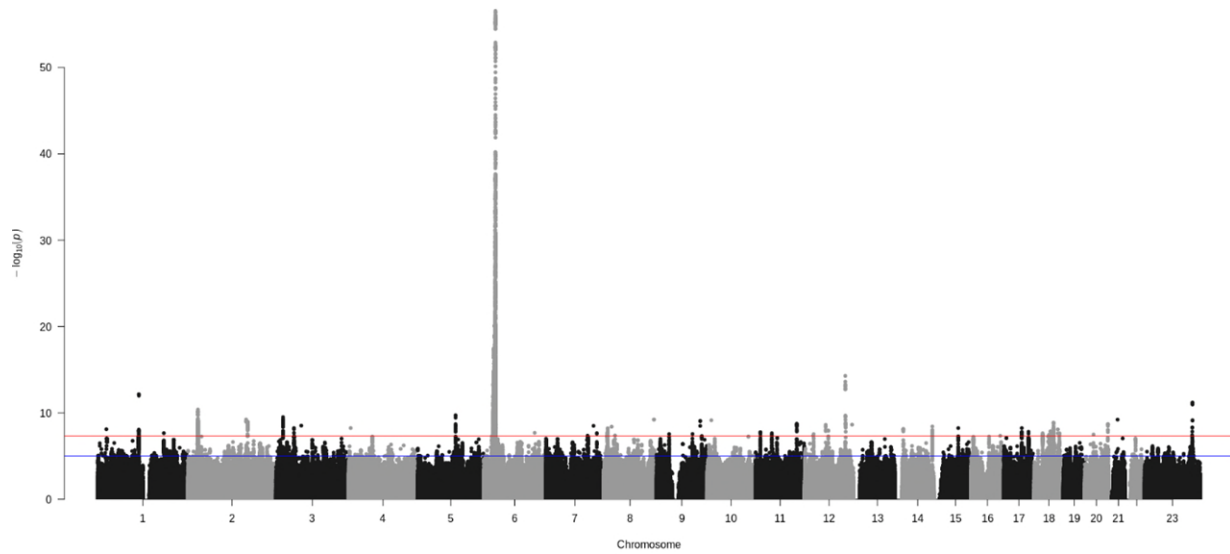

Supplementary Figure 2. Q-Q plot from GWAS of log-transformed annual total healthcare costs in FinnGen. Lambda 0.7 = 1.304, lambda 0.5 = 1.293, lambda 0.1 = 1.285, lambda 0.01 = 1.29, lambda 0.001 = 1.295.

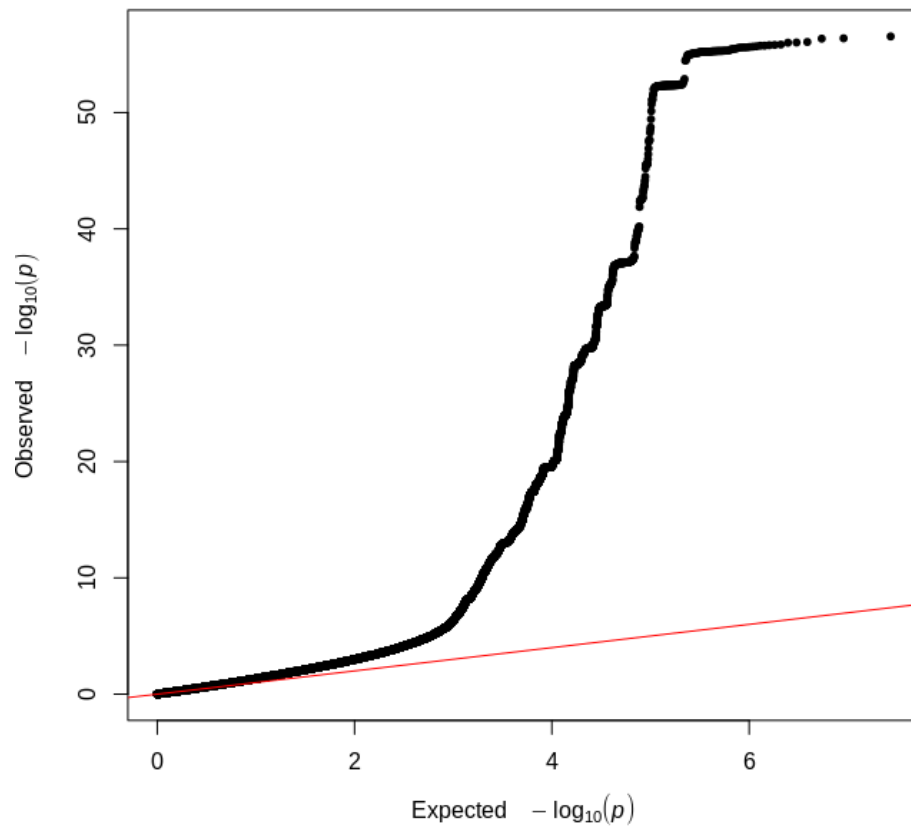

Supplementary Figure 3. Monetary impact of waist circumference for 343,160 FinnGen participants as estimated from Mendelian Randomization at varying baseline healthcare costs. SD is standard deviation. Red point indicates the healthcare costs calculated at the 50<sup>th</sup> percentile of waist circumference (WC).

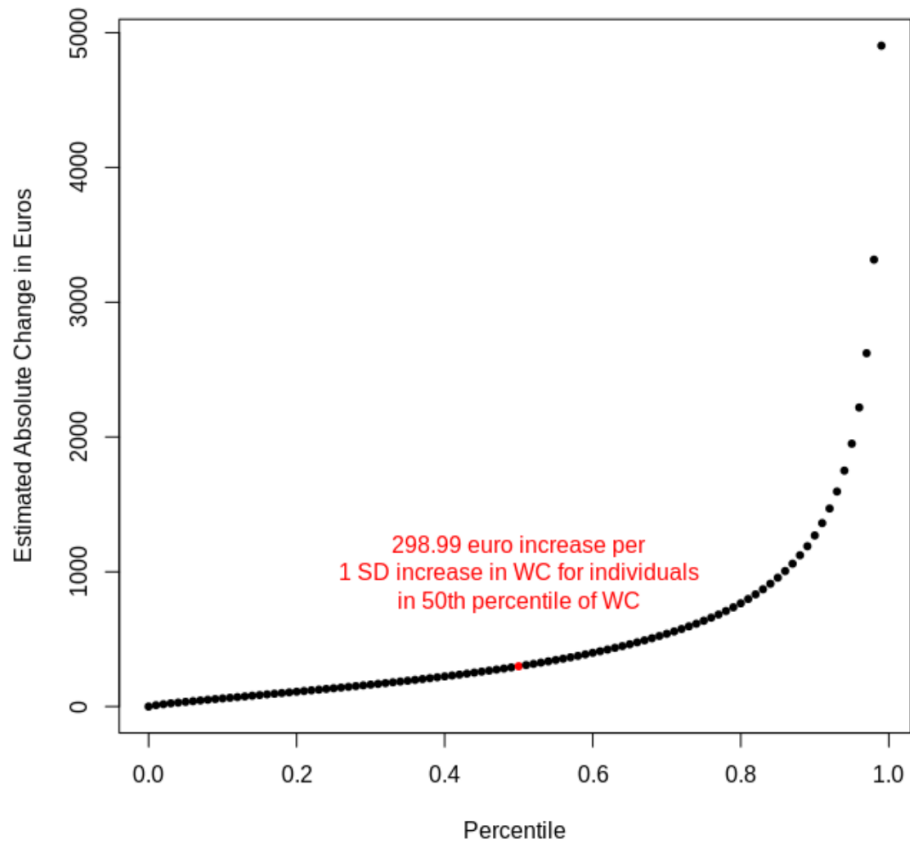

Supplementary Figure 4. Polygenic score analysis between Finland, United Kingdom, and Netherlands for primary, secondary, medication, and total healthcare costs for total costs (A), total costs per year (B), and log total costs per year (C). Points indicate beta effect size estimates and bars indicate 95% confidence interval. Two-sided p-values were calculated from the effect estimates and standard errors of the Mendelian Randomization model and evaluated at alpha = 0.05 without adjustment for multiple testing hypothesis. UK = United Kingdom and NL = Netherlands.

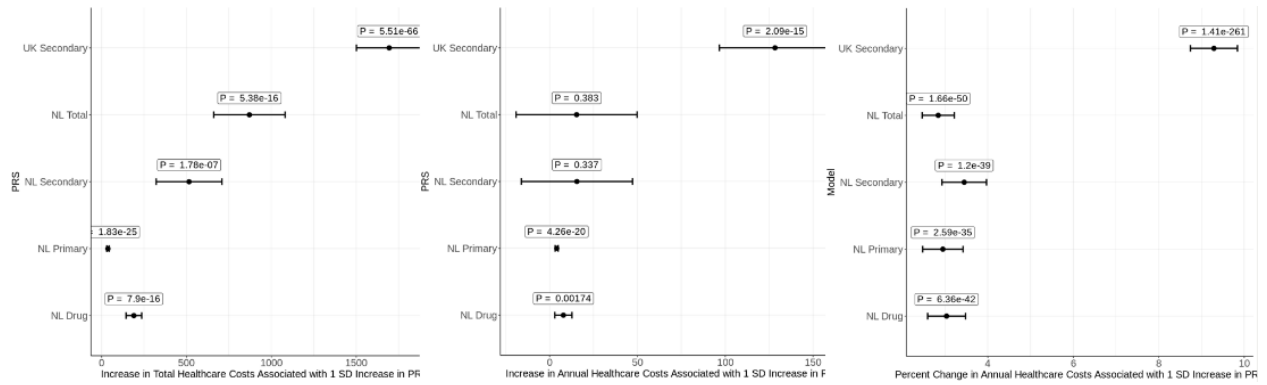

Supplementary Figure 5. Correlation between GWAS- and weighted linear regression-based models in reweighted FinnGen cohort.

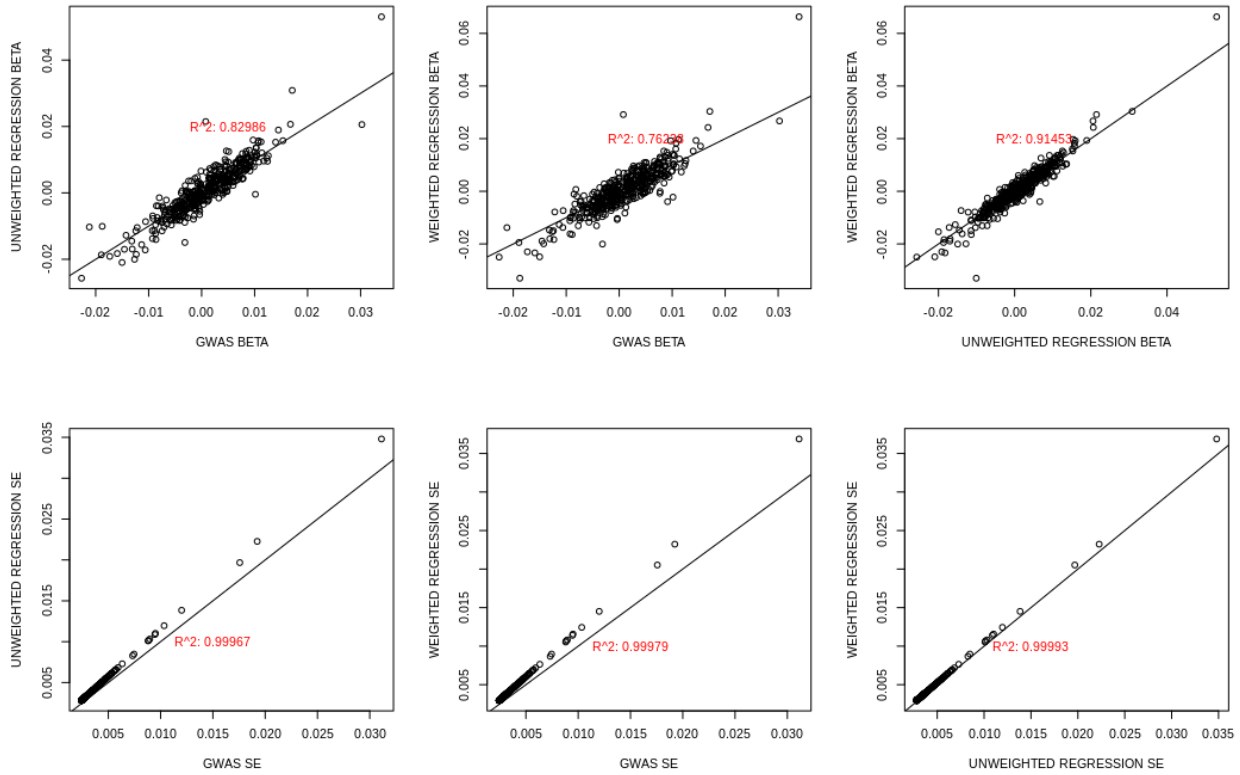

## Supplementary Tables

Supplementary Table 1. Summary of summary statistics used as genetic instruments for exposures and mediators.

| Phenotype                                                                                                   | ID from MRC IEU OpenGWAS Database | Year | Sample size | Population | N SNPs available in sumstats | Unit     | Transformation coefficient used to transform SD to raw units | Reference                                                                                             | N SNPs used in MR | R-square value | F-statistic |
|-------------------------------------------------------------------------------------------------------------|-----------------------------------|------|-------------|------------|------------------------------|----------|--------------------------------------------------------------|-------------------------------------------------------------------------------------------------------|-------------------|----------------|-------------|
| HDL cholesterol                                                                                             | ieu-a-299                         | 2013 | 187167      | Mixed      | 2447442                      | sd       | 1                                                            | <a href="http://lipidgenetics.org/">http://lipidgenetics.org/</a>                                     | 492               | 0.446178656    | 305.6735297 |
| HDL cholesterol                                                                                             | ieu-a-299                         | 2013 | 187167      | Mixed      | 2447442                      | raw      | 15.51018433                                                  | <a href="http://lipidgenetics.org/">http://lipidgenetics.org/</a>                                     | 492               | 0.446178656    | 305.6735297 |
| LDL cholesterol                                                                                             | ieu-a-300                         | 2013 | 173082      | Mixed      | 2437752                      | sd       | 1                                                            | <a href="http://lipidgenetics.org/">http://lipidgenetics.org/</a>                                     | 396               | 0.399169935    | 289.7114074 |
| LDL cholesterol                                                                                             | ieu-a-300                         | 2013 | 173082      | Mixed      | 2437752                      | raw      | 38.6745912                                                   | <a href="http://lipidgenetics.org/">http://lipidgenetics.org/</a>                                     | 396               | 0.399169935    | 289.7114074 |
| Triglycerides                                                                                               | ieu-a-302                         | 2013 | 177861      | Mixed      | 2439433                      | sd       | 1                                                            | <a href="http://lipidgenetics.org/">http://lipidgenetics.org/</a>                                     | 452               | 0.372324119    | 232.8201126 |
| Triglycerides                                                                                               | ieu-a-302                         | 2013 | 177861      | Mixed      | 2439433                      | raw      | 90.72424257                                                  | <a href="http://lipidgenetics.org/">http://lipidgenetics.org/</a>                                     | 452               | 0.372324119    | 232.8201126 |
| Waist circumference                                                                                         | ieu-a-61                          | 2015 | 232101      | European   | 2565408                      | sd       | 1                                                            | <a href="https://pubmed.ncbi.nlm.nih.gov/25673412/">https://pubmed.ncbi.nlm.nih.gov/25673412/</a>     | 42                | 0.01071664     | 59.85289658 |
| Waist circumference                                                                                         | ieu-a-61                          | 2015 | 232101      | European   | 2565408                      | raw      | 12.52                                                        | <a href="https://pubmed.ncbi.nlm.nih.gov/25673412/">https://pubmed.ncbi.nlm.nih.gov/25673412/</a>     | 42                | 0.01071664     | 59.85289658 |
| Body mass index                                                                                             | ieu-a-835                         | 2015 | 322154      | European   | 2554668                      | sd       | 1                                                            | <a href="https://www.nature.com/articles/nature14177">https://www.nature.com/articles/nature14177</a> | 69                | 0.01429497     | 67.69495838 |
| Body mass index                                                                                             | ieu-a-835                         | 2015 | 322154      | European   | 2554668                      | raw      | 4.77                                                         | <a href="https://www.nature.com/articles/nature14177">https://www.nature.com/articles/nature14177</a> | 69                | 0.01429497     | 67.69495838 |
| HDL cholesterol                                                                                             | ieu-b-109                         | 2020 | 403943      | European   | 12321875                     | sd       | 1                                                            | <a href="https://pubmed.ncbi.nlm.nih.gov/32203549/">https://pubmed.ncbi.nlm.nih.gov/32203549/</a>     | 362               | 0.135797258    | 175.1848019 |
| HDL cholesterol                                                                                             | ieu-b-109                         | 2020 | 403943      | European   | 12321875                     | raw      | 0.323918                                                     | <a href="https://pubmed.ncbi.nlm.nih.gov/32203549/">https://pubmed.ncbi.nlm.nih.gov/32203549/</a>     | 362               | 0.135797258    | 175.1848019 |
| Triglycerides                                                                                               | ieu-b-111                         | 2020 | 441016      | European   | 12321875                     | sd       | 1                                                            | <a href="https://pubmed.ncbi.nlm.nih.gov/32203549/">https://pubmed.ncbi.nlm.nih.gov/32203549/</a>     | 313               | 0.100635527    | 157.5492278 |
| Triglycerides                                                                                               | ieu-b-111                         | 2020 | 441016      | European   | 12321875                     | raw      | 1.02441                                                      | <a href="https://pubmed.ncbi.nlm.nih.gov/32203549/">https://pubmed.ncbi.nlm.nih.gov/32203549/</a>     | 313               | 0.100635527    | 157.5492278 |
| Systolic blood pressure                                                                                     | ieu-b-38                          | 2018 | 757601      | European   | 7088083                      | sd       | 1                                                            | <a href="https://pubmed.ncbi.nlm.nih.gov/30224653/">https://pubmed.ncbi.nlm.nih.gov/30224653/</a>     | 461               | 0.045387404    | 78.08774463 |
| LDL cholesterol                                                                                             | ieu-b-110                         | 2020 | 440546      | European   | 12321875                     | sd       | 1                                                            | <a href="https://pubmed.ncbi.nlm.nih.gov/32203549/">https://pubmed.ncbi.nlm.nih.gov/32203549/</a>     | 177               | 0.069019757    | 184.4486365 |
| LDL cholesterol                                                                                             | ieu-b-110                         | 2020 | 440546      | European   | 12321875                     | raw      | 0.434527                                                     | <a href="https://pubmed.ncbi.nlm.nih.gov/32203549/">https://pubmed.ncbi.nlm.nih.gov/32203549/</a>     | 177               | 0.069019757    | 184.4486365 |
| Systolic blood pressure                                                                                     | ieu-b-38                          | 2018 | 757601      | European   | 7088083                      | raw      | 20.7                                                         | <a href="https://pubmed.ncbi.nlm.nih.gov/30224653/">https://pubmed.ncbi.nlm.nih.gov/30224653/</a>     | 461               | 0.045387404    | 78.08774463 |
| Systolic blood pressure                                                                                     | ukb-a-360                         | 2017 | 317754      | European   | 10894596                     | sd       | 1                                                            | <a href="http://www.nealelab.is/uk-biobank">http://www.nealelab.is/uk-biobank</a>                     | 167               | 0.026764275    | 52.29766649 |
| Systolic blood pressure                                                                                     | ukb-a-360                         | 2017 | 317754      | European   | 10894596                     | raw      | 19.3261                                                      | <a href="http://www.nealelab.is/uk-biobank">http://www.nealelab.is/uk-biobank</a>                     | 167               | 0.026764275    | 52.29766649 |
| Waist circumference                                                                                         | ukb-a-382                         | 2015 | 224459      | European   | 2566630                      | sd       | 1                                                            | <a href="http://www.nealelab.is/uk-biobank">http://www.nealelab.is/uk-biobank</a>                     | 232               | 0.055958971    | 57.28973833 |
| Waist circumference                                                                                         | ukb-a-382                         | 2015 | 224459      | European   | 2566630                      | raw      | 13.4212                                                      | <a href="http://www.nealelab.is/uk-biobank">http://www.nealelab.is/uk-biobank</a>                     | 232               | 0.055958971    | 57.28973833 |
| Albumin                                                                                                     | ukb-d-30600_irt                   | 2018 | 385205      | European   | 13585334                     | quantile | 1                                                            | <a href="https://pan.ukbb.broadinstitute.org/">https://pan.ukbb.broadinstitute.org/</a>               | 203               | 0.042273402    | 83.71272288 |
| Albumin                                                                                                     | ukb-d-30600_raw                   | 2018 | 385205      | European   | 13585334                     | raw      | 1                                                            | <a href="https://pan.ukbb.broadinstitute.org/">https://pan.ukbb.broadinstitute.org/</a>               | 201               | 0.041610832    | 83.16346129 |
| Alanine aminotransferase                                                                                    | ukb-d-30620_irt                   | 2018 | 420449      | European   | 13586000                     | quantile | 1                                                            | <a href="https://pan.ukbb.broadinstitute.org/">https://pan.ukbb.broadinstitute.org/</a>               | 207               | 0.040748095    | 86.23880263 |
| Alanine aminotransferase                                                                                    | ukb-d-30620_raw                   | 2018 | 420449      | European   | 13586000                     | raw      | 1                                                            | <a href="https://pan.ukbb.broadinstitute.org/">https://pan.ukbb.broadinstitute.org/</a>               | 125               | 0.025493342    | 87.96605344 |
| Creatinine                                                                                                  | ukb-d-30700_irt                   | 2018 | 420401      | European   | 13585973                     | quantile | 1                                                            | <a href="https://pan.ukbb.broadinstitute.org/">https://pan.ukbb.broadinstitute.org/</a>               | 337               | 0.067826081    | 90.69520111 |
| Creatinine                                                                                                  | ukb-d-30700_raw                   | 2018 | 420401      | European   | 13585973                     | raw      | 1                                                            | <a href="https://pan.ukbb.broadinstitute.org/">https://pan.ukbb.broadinstitute.org/</a>               | 184               | 0.029946233    | 70.50195393 |
| C-reactive protein                                                                                          | ukb-d-30710_irt                   | 2018 | 419693      | European   | 13586004                     | quantile | 1                                                            | <a href="https://pan.ukbb.broadinstitute.org/">https://pan.ukbb.broadinstitute.org/</a>               | 210               | 0.082240904    | 179.0000753 |
| C-reactive protein                                                                                          | ukb-d-30710_raw                   | 2018 | 419693      | European   | 13586004                     | raw      | 1                                                            | <a href="https://pan.ukbb.broadinstitute.org/">https://pan.ukbb.broadinstitute.org/</a>               | 53                | 0.017841629    | 143.831148  |
| Cystatin C                                                                                                  | ukb-d-30720_irt                   | 2018 | 420588      | European   | 13586047                     | quantile | 1                                                            | <a href="https://pan.ukbb.broadinstitute.org/">https://pan.ukbb.broadinstitute.org/</a>               | 312               | 0.109139841    | 165.0261413 |
| Cystatin C                                                                                                  | ukb-d-30720_raw                   | 2018 | 420588      | European   | 13586047                     | raw      | 1                                                            | <a href="https://pan.ukbb.broadinstitute.org/">https://pan.ukbb.broadinstitute.org/</a>               | 196               | 0.062034264    | 141.8541338 |
| Glucose                                                                                                     | ukb-d-30740_irt                   | 2018 | 384760      | European   | 13585279                     | quantile | 1                                                            | <a href="https://pan.ukbb.broadinstitute.org/">https://pan.ukbb.broadinstitute.org/</a>               | 108               | 0.032547278    | 119.8196455 |
| Glucose                                                                                                     | ukb-d-30740_raw                   | 2018 | 384760      | European   | 13585279                     | raw      | 1                                                            | <a href="https://pan.ukbb.broadinstitute.org/">https://pan.ukbb.broadinstitute.org/</a>               | 61                | 0.012404914    | 79.21454429 |
| Glycated hemoglobin                                                                                         | ukb-d-30750_irt                   | 2018 | 419434      | European   | 13586180                     | quantile | 1                                                            | <a href="https://pan.ukbb.broadinstitute.org/">https://pan.ukbb.broadinstitute.org/</a>               | 320               | 0.106851885    | 156.6894856 |
| Glycated hemoglobin                                                                                         | ukb-d-30750_raw                   | 2018 | 419434      | European   | 13586180                     | raw      | 1                                                            | <a href="https://pan.ukbb.broadinstitute.org/">https://pan.ukbb.broadinstitute.org/</a>               | 190               | 0.046848766    | 108.4547446 |
| Lipoprotein(a)                                                                                              | ukb-d-30790_irt                   | 2018 | 335796      | European   | 13583854                     | quantile | 1                                                            | <a href="https://pan.ukbb.broadinstitute.org/">https://pan.ukbb.broadinstitute.org/</a>               | 22                | 0.335032837    | 7689.715379 |
| Lipoprotein(a)                                                                                              | ukb-d-30790_raw                   | 2018 | 335796      | European   | 13583854                     | raw      | 1                                                            | <a href="https://pan.ukbb.broadinstitute.org/">https://pan.ukbb.broadinstitute.org/</a>               | 21                | 0.507893887    | 16502.20565 |
| Vitamin D                                                                                                   | ukb-d-30890_irt                   | 2018 | 401516      | European   | 13585763                     | quantile | 1                                                            | <a href="https://pan.ukbb.broadinstitute.org/">https://pan.ukbb.broadinstitute.org/</a>               | 59                | 0.036643376    | 258.8179126 |
| Vitamin D                                                                                                   | ukb-d-30890_raw                   | 2018 | 401516      | European   | 13585763                     | raw      | 1                                                            | <a href="https://pan.ukbb.broadinstitute.org/">https://pan.ukbb.broadinstitute.org/</a>               | 65                | 0.039433759    | 253.5472881 |
| Type 2 diabetes                                                                                             | ukb-a-306                         | 2017 | 336473      | European   | 10894596                     | sd       | 1                                                            | <a href="http://www.nealelab.is/uk-biobank">http://www.nealelab.is/uk-biobank</a>                     | 52                | 0.010261586    | 67.07682863 |
| Back pain                                                                                                   | ukb-a-473                         | 2017 | 336650      | European   | 10894596                     | sd       | 1                                                            | <a href="http://www.nealelab.is/uk-biobank">http://www.nealelab.is/uk-biobank</a>                     | 9                 | 0.001084516    | 40.6097743  |
| Chronic ischemic heart disease                                                                              | ukb-a-534                         | 2017 | 337199      | European   | 10894596                     | sd       | 1                                                            | <a href="http://www.nealelab.is/uk-biobank">http://www.nealelab.is/uk-biobank</a>                     | 16                | 0.003125826    | 66.07982909 |
| Chronic obstructive pulmonary disease                                                                       | ukb-a-543                         | 2017 | 337199      | European   | 10894596                     | sd       | 1                                                            | <a href="http://www.nealelab.is/uk-biobank">http://www.nealelab.is/uk-biobank</a>                     | 2                 | 0.000185913    | 31.35039071 |
| Stroke                                                                                                      | ukb-d-C_STROKE                    | 2018 | 361194      | European   | 12404026                     | binary   | 1                                                            | <a href="http://www.nealelab.is/uk-biobank">http://www.nealelab.is/uk-biobank</a>                     | 1                 | 8.79E-05       | 31.76203333 |
| Medication for cholesterol, blood pressure, diabetes, or take exogenous hormones: Blood pressure medication | ukb-b-18009                       | 2018 | 294710      | European   | 9851867                      | binary   | 1                                                            | <a href="http://www.nealelab.is/uk-biobank">http://www.nealelab.is/uk-biobank</a>                     | 96                | 0.02833243     | 56.81972    |

Supplementary Table 2. Top independent genome-wide significant hits from GWAS of healthcare costs in FinnGen performed using REGENIE. REGENIE fit a whole-genome regression model and performed single-variant association testing, which produces effect estimates, standard errors, and p-values of association between variants and outcomes. P-values were considered at genome-wide significant ( $P < 5 \times 10^{-8}$ ) to adjust for multiple hypothesis testing.

| chr | pos      | rsid        | ref | alt | pval     | beta     | se       | eaf      | info     |
|-----|----------|-------------|-----|-----|----------|----------|----------|----------|----------|
| 1   | 24697088 | rs144552623 | A   | G   | 7.77E-09 | 0.064115 | 0.011105 | 0.012629 | 0.962229 |
| 1   | 1.14E+08 | rs6679677   | C   | A   | 6.92E-13 | 0.024785 | 0.003451 | 0.146586 | 0.999818 |
| 1   | 1.82E+08 | rs11806150  | A   | G   | 2.19E-08 | -0.02097 | 0.003747 | 0.121279 | 0.996973 |
| 2   | 27111756 | rs2891550   | C   | T   | 4.14E-11 | 0.016507 | 0.002502 | 0.598099 | 0.990897 |
| 2   | 28211309 | rs72818428  | A   | G   | 9.77E-10 | 0.02183  | 0.003571 | 0.135733 | 0.995658 |
| 2   | 1.59E+08 | rs62173233  | T   | A   | 5.76E-10 | -0.02558 | 0.004129 | 0.098028 | 0.98583  |
| 2   | 1.64E+08 | rs1529997   | C   | T   | 1.06E-09 | 0.016677 | 0.002734 | 0.723271 | 0.995827 |
| 3   | 18741984 | rs4532156   | T   | C   | 3.07E-10 | 0.016226 | 0.002577 | 0.657647 | 0.99458  |
| 3   | 48670914 | rs73078367  | C   | T   | 5.64E-09 | -0.01732 | 0.002973 | 0.214    | 0.998114 |
| 5   | 1.04E+08 | rs2403304   | T   | C   | 1.90E-10 | 0.016368 | 0.00257  | 0.346732 | 0.996614 |
| 6   | 28708617 | rs9366724   | A   | T   | 1.22E-13 | 0.032242 | 0.004348 | 0.086162 | 0.998889 |
| 6   | 31434633 | rs6935045   | T   | A   | 4.52E-13 | 0.024974 | 0.00345  | 0.147252 | 0.997437 |
| 6   | 31521145 | rs549105374 | A   | T   | 1.50E-17 | -0.03054 | 0.003582 | 0.134512 | 0.996997 |
| 6   | 32624232 | rs1281947   | A   | G   | 4.40E-57 | 0.054459 | 0.00342  | 0.150316 | 0.999619 |
| 6   | 32789325 | rs9276710   | T   | C   | 1.38E-29 | 0.033907 | 0.003002 | 0.20858  | 0.998497 |
| 7   | 1.4E+08  | rs4507685   | T   | A   | 2.22E-08 | -0.01371 | 0.002451 | 0.455723 | 0.994841 |
| 8   | 10924932 | rs4841459   | A   | C   | 5.93E-09 | -0.01424 | 0.002446 | 0.45833  | 0.995976 |
| 8   | 30931118 | rs2344118   | C   | A   | 4.11E-08 | 0.014402 | 0.002625 | 0.316921 | 0.995778 |
| 9   | 34424949 | rs62559895  | T   | C   | 2.81E-08 | 0.017022 | 0.003066 | 0.199716 | 0.992107 |
| 9   | 98759624 | rs192202574 | C   | T   | 2.76E-08 | 0.051645 | 0.009295 | 0.017675 | 0.994859 |
| 9   | 1.24E+08 | rs944339    | C   | T   | 4.88E-08 | 0.013363 | 0.002449 | 0.482113 | 0.994298 |
| 11  | 13298291 | rs6486116   | A   | C   | 1.75E-08 | 0.015295 | 0.002714 | 0.720071 | 0.999488 |
| 11  | 44706962 | rs10838338  | C   | T   | 2.24E-08 | -0.02581 | 0.004615 | 0.076855 | 0.986068 |
| 11  | 1.13E+08 | rs1836798   | A   | G   | 1.91E-09 | 0.014821 | 0.002468 | 0.42046  | 0.997589 |
| 12  | 24275471 | rs10842306  | A   | G   | 2.87E-08 | -0.01362 | 0.002454 | 0.5458   | 0.998222 |
| 12  | 57584957 | rs775251    | C   | T   | 2.38E-09 | 0.01531  | 0.002565 | 0.649326 | 0.994065 |
| 12  | 64702618 | rs1690264   | C   | T   | 1.08E-08 | 0.014164 | 0.002477 | 0.474906 | 0.973555 |
| 12  | 1.11E+08 | rs3184504   | T   | C   | 2.45E-14 | -0.01893 | 0.002483 | 0.591367 | 0.999925 |
| 14  | 1.03E+08 | rs8010932   | A   | G   | 3.77E-09 | 0.016796 | 0.00285  | 0.242823 | 0.997046 |
| 15  | 67165147 | rs2289261   | G   | C   | 5.65E-09 | 0.014383 | 0.002468 | 0.57319  | 0.997683 |
| 16  | 80390010 | rs12919036  | A   | G   | 4.44E-08 | -0.01387 | 0.002534 | 0.378044 | 0.986577 |
| 17  | 49222427 | rs55978930  | A   | G   | 5.61E-09 | 0.014792 | 0.002538 | 0.370926 | 0.990835 |
| 17  | 67896391 | rs61676547  | G   | C   | 1.56E-08 | 0.016152 | 0.002856 | 0.24139  | 0.99716  |
| 18  | 23496800 | rs303754    | G   | T   | 2.27E-08 | 0.013676 | 0.002447 | 0.502685 | 0.993587 |
| 18  | 41733420 | rs67311948  | T   | C   | 3.51E-08 | -0.02267 | 0.004111 | 0.097921 | 0.996927 |
| 18  | 53198529 | rs62099231  | G   | A   | 1.34E-09 | 0.014859 | 0.002451 | 0.459507 | 0.998297 |
| 20  | 24379863 | rs67976007  | G   | A   | 3.21E-08 | -0.02409 | 0.004356 | 0.087054 | 0.988078 |
| 20  | 63951116 | rs2320226   | T   | C   | 2.03E-09 | -0.01514 | 0.002525 | 0.616045 | 0.989463 |

**Supplementary Table 3. Full Mendelian Randomization results for all risk factors using all methods in Finland. Mendelian Randomization models produced effect estimates, standard errors, and p-values of causal effects of exposures and outcomes. P-values were adjusted for multiple hypothesis testing with the Bonferroni correction. Table was truncated at 100 rows. See Supplementary Tables for full table.**

| Exposure                 | Unit     | Outcome  | Method                    | N SNPs | Beta association | Standard error | P-value     | Percent change | Confidence intervals for percentage change |
|--------------------------|----------|----------|---------------------------|--------|------------------|----------------|-------------|----------------|--------------------------------------------|
| Waist circumference      | Raw unit | AvoHILMO | Inverse variance weighted | 213    | 0.011647989      | 0.001533748    | 3.09E-14    | 1.17           | [0.87, 1.48]                               |
| Waist circumference      | 1 SD     | AvoHILMO | Inverse variance weighted | 213    | 0.156329994      | 0.02058474     | 3.09E-14    | 16.92          | [12.3, 21.73]                              |
| Waist circumference      | 1 SD     | AvoHILMO | Inverse variance weighted | 39     | 0.157797295      | 0.024504841    | 1.20E-10    | 17.09          | [11.6, 22.85]                              |
| Waist circumference      | Raw unit | AvoHILMO | Inverse variance weighted | 39     | 0.012603618      | 0.001957256    | 1.20E-10    | 1.27           | [0.88, 1.66]                               |
| Body mass index          | Raw unit | AvoHILMO | Inverse variance weighted | 66     | 0.024336386      | 0.004070851    | 2.26E-09    | 2.46           | [1.65, 3.28]                               |
| Body mass index          | 1 SD     | AvoHILMO | Inverse variance weighted | 66     | 0.116084562      | 0.019417959    | 2.26E-09    | 12.31          | [8.12, 16.67]                              |
| Waist circumference      | 1 SD     | AvoHILMO | Weighted median           | 213    | 0.150655502      | 0.025483785    | 3.38E-09    | 16.26          | [10.6, 22.21]                              |
| Waist circumference      | Raw unit | AvoHILMO | Weighted median           | 213    | 0.011225189      | 0.001943269    | 7.63E-09    | 1.13           | [0.74, 1.51]                               |
| Systolic blood pressure  | Raw unit | AvoHILMO | Inverse variance weighted | 426    | 0.000199395      | 3.55E-05       | 2.01E-08    | 0.02           | [0.01, 0.03]                               |
| Systolic blood pressure  | 1 SD     | AvoHILMO | Inverse variance weighted | 426    | 0.004127469      | 0.000735555    | 2.01E-08    | 0.41           | [0.27, 0.56]                               |
| Waist circumference      | 1 SD     | AvoHILMO | Weighted median           | 39     | 0.161155417      | 0.031453443    | 3.00E-07    | 17.49          | [10.46, 24.96]                             |
| Waist circumference      | Raw unit | AvoHILMO | Weighted median           | 39     | 0.012871838      | 0.002556223    | 4.77E-07    | 1.3            | [0.79, 1.8]                                |
| Systolic blood pressure  | Raw unit | AvoHILMO | Weighted median           | 146    | 0.006214433      | 0.001294732    | 1.59E-06    | 0.62           | [0.37, 0.88]                               |
| Systolic blood pressure  | 1 SD     | AvoHILMO | Weighted median           | 146    | 0.120100759      | 0.025166939    | 1.82E-06    | 12.76          | [7.33, 18.46]                              |
| Body mass index          | Raw unit | AvoHILMO | Weighted median           | 66     | 0.025093864      | 0.005364229    | 2.90E-06    | 2.54           | [1.47, 3.62]                               |
| Body mass index          | 1 SD     | AvoHILMO | Weighted median           | 66     | 0.119697733      | 0.025846461    | 3.64E-06    | 12.72          | [7.15, 18.57]                              |
| Systolic blood pressure  | 1 SD     | AvoHILMO | Inverse variance weighted | 146    | 0.097018559      | 0.020991154    | 3.80E-06    | 10.19          | [5.75, 14.82]                              |
| Systolic blood pressure  | Raw unit | AvoHILMO | Inverse variance weighted | 146    | 0.00502008       | 0.001086156    | 3.80E-06    | 0.5            | [0.29, 0.72]                               |
| Systolic blood pressure  | Raw unit | AvoHILMO | Weighted median           | 426    | 0.000226627      | 4.95E-05       | 4.70E-06    | 0.02           | [0.01, 0.03]                               |
| Systolic blood pressure  | 1 SD     | AvoHILMO | Weighted median           | 426    | 0.004691178      | 0.001034961    | 5.82E-06    | 0.47           | [0.27, 0.67]                               |
| Triglycerides            | 1 SD     | AvoHILMO | Inverse variance weighted | 420    | 0.048058292      | 0.011033777    | 1.33E-05    | 4.92           | [2.68, 7.22]                               |
| Triglycerides            | Raw unit | AvoHILMO | Inverse variance weighted | 420    | 0.000529718      | 0.000121619    | 1.33E-05    | 0.05           | [0.03, 0.08]                               |
| Alanine aminotransferase | 1 SD     | AvoHILMO | Inverse variance weighted | 170    | 0.068380093      | 0.016138862    | 2.27E-05    | 7.08           | [3.74, 10.52]                              |
| Alanine aminotransferase | Raw unit | AvoHILMO | Inverse variance weighted | 102    | 0.005437255      | 0.001382758    | 8.42E-05    | 0.55           | [0.27, 0.82]                               |
| C-reactive protein       | Raw unit | AvoHILMO | Inverse variance weighted | 39     | 0.017461588      | 0.004628387    | 0.000161481 | 1.76           | [0.84, 2.69]                               |
| Glycated hemoglobin      | Raw unit | AvoHILMO | Inverse variance weighted | 145    | 0.008960515      | 0.002495543    | 0.000329908 | 0.9            | [0.41, 1.39]                               |
| Systolic blood pressure  | 1 SD     | AvoHILMO | MR Egger                  | 426    | 0.006640303      | 0.001846283    | 0.000360413 | 0.67           | [0.3, 1.03]                                |
| Systolic blood pressure  | Raw unit | AvoHILMO | MR Egger                  | 426    | 0.000320788      | 8.92E-05       | 0.000360413 | 0.03           | [0.01, 0.05]                               |
| Waist circumference      | Raw unit | AvoHILMO | Weighted mode             | 213    | 0.012438049      | 0.003439055    | 0.000372937 | 1.25           | [0.57, 1.94]                               |
| HDL cholesterol          | 1 SD     | AvoHILMO | Inverse variance weighted | 445    | -0.035585528     | 0.010071605    | 0.00041048  | -3.5           | [-5.38, -1.57]                             |
| HDL cholesterol          | Raw unit | AvoHILMO | Inverse variance weighted | 445    | -0.002294333     | 0.000649354    | 0.00041048  | -0.23          | [-0.36, -0.1]                              |
| Waist circumference      | 1 SD     | AvoHILMO | Weighted mode             | 213    | 0.166933546      | 0.047948933    | 0.000605406 | 18.17          | [7.57, 29.81]                              |
| Waist circumference      | 1 SD     | AvoHILMO | MR Egger                  | 213    | 0.22081111       | 0.063593569    | 0.000626058 | 24.71          | [10.09, 41.26]                             |
| Waist circumference      | Raw unit | AvoHILMO | MR Egger                  | 213    | 0.016452412      | 0.004738292    | 0.000626058 | 1.66           | [0.72, 2.61]                               |
| Cystatin C               | 1 SD     | AvoHILMO | Inverse variance weighted | 269    | 0.03052467       | 0.009180438    | 0.000884285 | 3.1            | [1.26, 4.97]                               |
| Waist circumference      | Raw unit | AvoHILMO | Weighted mode             | 39     | 0.021059733      | 0.00588448     | 0.0009631   | 2.13           | [0.96, 3.31]                               |
| C-reactive protein       | 1 SD     | AvoHILMO | Inverse variance weighted | 179    | 0.034401483      | 0.010538926    | 0.001097619 | 3.5            | [1.38, 5.66]                               |
| Waist circumference      | Raw unit | AvoHILMO | Simple mode               | 39     | 0.021059733      | 0.00605371     | 0.001279398 | 2.13           | [0.92, 3.35]                               |
| Cystatin C               | Raw unit | AvoHILMO | Inverse variance weighted | 166    | 0.21675076       | 0.068627916    | 0.001586667 | 24.2           | [8.57, 42.09]                              |
| Waist circumference      | 1 SD     | AvoHILMO | Weighted mode             | 39     | 0.263667854      | 0.077663751    | 0.001619041 | 30.17          | [11.79, 51.57]                             |
| Systolic blood pressure  | 1 SD     | AvoHILMO | Weighted mode             | 146    | 0.163766191      | 0.051578686    | 0.001829953 | 17.79          | [6.47, 30.32]                              |
| Body mass index          | 1 SD     | AvoHILMO | MR Egger                  | 66     | 0.187071412      | 0.057559055    | 0.001841054 | 20.57          | [7.71, 34.97]                              |
| Body mass index          | Raw unit | AvoHILMO | MR Egger                  | 66     | 0.039218325      | 0.012066888    | 0.001841054 | 4              | [1.57, 6.49]                               |
| Waist circumference      | 1 SD     | AvoHILMO | Simple mode               | 39     | 0.263667854      | 0.079831788    | 0.002091859 | 30.17          | [11.32, 52.22]                             |
| Alanine aminotransferase | 1 SD     | AvoHILMO | Weighted median           | 170    | 0.060633163      | 0.019981172    | 0.002409229 | 6.25           | [2.17, 10.49]                              |
| HDL cholesterol          | Raw unit | AvoHILMO | Inverse variance weighted | 308    | -0.093564365     | 0.030922704    | 0.002480174 | -8.93          | [-14.29, -3.24]                            |
| HDL cholesterol          | 1 SD     | AvoHILMO | Inverse variance weighted | 308    | -0.030307182     | 0.01001642     | 0.002480174 | -2.99          | [-4.87, -1.06]                             |



|                          |          |          |                           |     |              |             |             |       |                 |
|--------------------------|----------|----------|---------------------------|-----|--------------|-------------|-------------|-------|-----------------|
| Glycated hemoglobin      | 1 SD     | AvoHILMO | Inverse variance weighted | 256 | 0.030018343  | 0.010001361 | 0.002687186 | 3.05  | [1.05, 5.09]    |
| Body mass index          | 1 SD     | AvoHILMO | Weighted mode             | 66  | 0.164177212  | 0.052978758 | 0.002868895 | 17.84 | [6.22, 30.74]   |
| Systolic blood pressure  | Raw unit | AvoHILMO | Weighted mode             | 146 | 0.008473835  | 0.002843404 | 0.003379167 | 0.85  | [0.29, 1.41]    |
| Body mass index          | Raw unit | AvoHILMO | Weighted mode             | 66  | 0.034418703  | 0.011901304 | 0.005201318 | 3.5   | [1.12, 5.94]    |
| Systolic blood pressure  | Raw unit | AvoHILMO | Weighted mode             | 426 | 0.000280712  | 0.000100328 | 0.00537648  | 0.03  | [0.01, 0.05]    |
| C-reactive protein       | Raw unit | AvoHILMO | MR Egger                  | 39  | 0.020908101  | 0.007267671 | 0.006630153 | 2.11  | [0.67, 3.58]    |
| C-reactive protein       | 1 SD     | AvoHILMO | Weighted mode             | 179 | 0.026700055  | 0.009748048 | 0.006789337 | 2.71  | [0.76, 4.69]    |
| Systolic blood pressure  | 1 SD     | AvoHILMO | Weighted mode             | 426 | 0.005810747  | 0.002143533 | 0.006983442 | 0.58  | [0.16, 1.01]    |
| Systolic blood pressure  | Raw unit | AvoHILMO | Simple mode               | 146 | 0.008473835  | 0.003225941 | 0.009545988 | 0.85  | [0.22, 1.49]    |
| Triglycerides            | Raw unit | AvoHILMO | Inverse variance weighted | 274 | 0.02603929   | 0.010680411 | 0.014767064 | 2.64  | [0.51, 4.81]    |
| Triglycerides            | 1 SD     | AvoHILMO | Inverse variance weighted | 274 | 0.026674909  | 0.01094112  | 0.014767064 | 2.7   | [0.52, 4.93]    |
| Waist circumference      | 1 SD     | AvoHILMO | MR Egger                  | 39  | 0.211799582  | 0.086399014 | 0.019073604 | 23.59 | [4.34, 46.4]    |
| Waist circumference      | Raw unit | AvoHILMO | MR Egger                  | 39  | 0.0169169    | 0.00690088  | 0.019073604 | 1.71  | [0.34, 3.09]    |
| Systolic blood pressure  | 1 SD     | AvoHILMO | Simple mode               | 146 | 0.163766191  | 0.069151801 | 0.019193436 | 17.79 | [2.86, 34.89]   |
| Triglycerides            | Raw unit | AvoHILMO | Simple mode               | 420 | 0.00090712   | 0.000407746 | 0.026631999 | 0.09  | [0.01, 0.17]    |
| HDL cholesterol          | Raw unit | AvoHILMO | Simple mode               | 445 | -0.004500776 | 0.002041394 | 0.027983305 | -0.45 | [-0.85, -0.05]  |
| HDL cholesterol          | 1 SD     | AvoHILMO | Simple mode               | 445 | -0.069807863 | 0.032886841 | 0.03433444  | -6.74 | [-12.56, -0.53] |
| Cystatin C               | Raw unit | AvoHILMO | Weighted mode             | 166 | 0.154710816  | 0.073771966 | 0.03750487  | 16.73 | [1.02, 34.89]   |
| Triglycerides            | 1 SD     | AvoHILMO | Simple mode               | 420 | 0.082297792  | 0.040471129 | 0.042632313 | 8.58  | [0.3, 17.54]    |
| Body mass index          | Raw unit | AvoHILMO | Simple mode               | 66  | 0.025985283  | 0.012660946 | 0.044162024 | 2.63  | [0.12, 5.21]    |
| Body mass index          | 1 SD     | AvoHILMO | Simple mode               | 66  | 0.1239498    | 0.060796689 | 0.045545247 | 13.2  | [0.48, 27.52]   |
| Systolic blood pressure  | 1 SD     | AvoHILMO | Simple mode               | 426 | 0.006138355  | 0.003094908 | 0.047968989 | 0.62  | [0.01, 1.23]    |
| Triglycerides            | 1 SD     | AvoHILMO | Weighted mode             | 420 | 0.027519008  | 0.014241992 | 0.054003135 | 2.79  | [-0.04, 5.7]    |
| Glucose                  | 1 SD     | AvoHILMO | Weighted median           | 88  | -0.039584478 | 0.020723638 | 0.056118744 | -3.88 | [-7.71, 0.1]    |
| Systolic blood pressure  | 1 SD     | AvoHILMO | MR Egger                  | 146 | 0.134657275  | 0.070006482 | 0.05639087  | 14.41 | [-0.26, 31.24]  |
| Systolic blood pressure  | Raw unit | AvoHILMO | MR Egger                  | 146 | 0.006967638  | 0.00362238  | 0.05639087  | 0.7   | [-0.01, 1.42]   |
| Cystatin C               | Raw unit | AvoHILMO | MR Egger                  | 166 | 0.186798752  | 0.097377382 | 0.056810655 | 20.54 | [-0.41, 45.89]  |
| Cystatin C               | 1 SD     | AvoHILMO | Weighted mode             | 269 | 0.018803357  | 0.010083979 | 0.063319807 | 1.9   | [-0.1, 3.93]    |
| Triglycerides            | Raw unit | AvoHILMO | Weighted mode             | 420 | 0.000303326  | 0.000164404 | 0.065742327 | 0.03  | [0, 0.06]       |
| C-reactive protein       | Raw unit | AvoHILMO | Weighted median           | 39  | 0.012220736  | 0.006664778 | 0.066708931 | 1.23  | [-0.08, 2.56]   |
| Systolic blood pressure  | Raw unit | AvoHILMO | Simple mode               | 426 | 0.000296539  | 0.000162894 | 0.069395211 | 0.03  | [0, 0.06]       |
| Alanine aminotransferase | 1 SD     | AvoHILMO | Weighted mode             | 170 | 0.050719316  | 0.028048354 | 0.072340531 | 5.2   | [-0.42, 11.15]  |
| Glucose                  | Raw unit | AvoHILMO | Inverse variance weighted | 52  | 0.046461514  | 0.026508185 | 0.079649511 | 4.76  | [-0.55, 10.34]  |
| C-reactive protein       | 1 SD     | AvoHILMO | Weighted median           | 179 | 0.026135799  | 0.015474028 | 0.091217377 | 2.65  | [-0.42, 5.81]   |
| Cystatin C               | Raw unit | AvoHILMO | Weighted median           | 166 | 0.125643426  | 0.074530989 | 0.091836694 | 13.39 | [-2.02, 31.22]  |
| LDL cholesterol          | Raw unit | AvoHILMO | Weighted mode             | 151 | -0.048593807 | 0.029189058 | 0.098041022 | -4.74 | [-10.04, 0.87]  |
| Waist circumference      | Raw unit | AvoHILMO | Simple mode               | 213 | 0.009188448  | 0.005572568 | 0.100655004 | 0.92  | [-0.17, 2.03]   |
| Alanine aminotransferase | 1 SD     | AvoHILMO | MR Egger                  | 170 | 0.049404603  | 0.029931856 | 0.100694782 | 5.06  | [-0.92, 11.41]  |
| Cystatin C               | 1 SD     | AvoHILMO | Weighted median           | 269 | 0.017123649  | 0.010447336 | 0.101204    | 1.73  | [-0.33, 3.83]   |
| C-reactive protein       | 1 SD     | AvoHILMO | MR Egger                  | 179 | 0.024003723  | 0.014585055 | 0.101584604 | 2.43  | [-0.46, 5.4]    |
| LDL cholesterol          | 1 SD     | AvoHILMO | Weighted mode             | 151 | -0.021115321 | 0.013012947 | 0.106766383 | -2.09 | [-4.56, 0.44]   |
| Triglycerides            | Raw unit | AvoHILMO | Weighted mode             | 274 | 0.019876159  | 0.012436571 | 0.111154657 | 2.01  | [-0.45, 4.52]   |
| Cystatin C               | 1 SD     | AvoHILMO | MR Egger                  | 269 | 0.0203131    | 0.012711973 | 0.111236788 | 2.05  | [-0.46, 4.63]   |
| Triglycerides            | 1 SD     | AvoHILMO | Weighted mode             | 274 | 0.020361336  | 0.01274873  | 0.11139432  | 2.06  | [-0.46, 4.64]   |
| Waist circumference      | 1 SD     | AvoHILMO | Simple mode               | 213 | 0.123320002  | 0.077599028 | 0.11350652  | 13.12 | [-2.84, 31.71]  |
| LDL cholesterol          | Raw unit | AvoHILMO | Weighted median           | 359 | -0.000591731 | 0.00038365  | 0.122982963 | -0.06 | [-0.13, 0.02]   |
| LDL cholesterol          | 1 SD     | AvoHILMO | MR Egger                  | 359 | -0.025231894 | 0.016400426 | 0.124814649 | -2.49 | [-5.58, 0.69]   |
| LDL cholesterol          | Raw unit | AvoHILMO | MR Egger                  | 359 | -0.000652415 | 0.000424062 | 0.124814649 | -0.07 | [-0.15, 0.02]   |
| HDL cholesterol          | 1 SD     | AvoHILMO | Weighted mode             | 308 | -0.01997558  | 0.01312873  | 0.129159539 | -1.98 | [-4.47, 0.58]   |
| Alanine aminotransferase | 1 SD     | AvoHILMO | Simple mode               | 170 | 0.071356397  | 0.046872315 | 0.129788585 | 7.4   | [-2.03, 17.73]  |
| HDL cholesterol          | Raw unit | AvoHILMO | Weighted mode             | 308 | -0.061686834 | 0.041015775 | 0.13372925  | -5.98 | [-13.24, 1.89]  |
| LDL cholesterol          | 1 SD     | AvoHILMO | Weighted median           | 359 | -0.022884947 | 0.015567028 | 0.141537119 | -2.26 | [-5.2, 0.77]    |

Supplementary Table 4. Mendelian Randomization replication results in the United Kingdom and Netherlands. Mendelian Randomization models produced effect estimates, standard errors, and p-values of causal effects of exposures and outcomes. P-values were adjusted for multiple hypothesis testing with the Bonferroni correction.

| Phenotype | Country | Effect size | Unit for effect size | Confidence interval for effect size | P-value  | Monetary effect | Unit for monetary effect |
|-----------|---------|-------------|----------------------|-------------------------------------|----------|-----------------|--------------------------|
| WC        | UK      | 13.62       | cm                   | [11.66, 15.58]                      | 3.13E-42 | 162.0849697     | per 10 cm                |
| WC        | UK      | 182.82      | SD                   | [156.51, 209.13]                    | 3.13E-42 | 217.5651553     | per SD                   |
| WC        | UK      | 7.94        | cm                   | [4.99, 10.89]                       | 1.33E-07 | 94.49006307     | per 10 cm                |
| WC        | UK      | 99.37       | SD                   | [62.44, 136.30]                     | 1.33E-07 | 118.255385      | per SD                   |
| BMI       | UK      | 18.66       | kg/m <sup>2</sup>    | [11.54, 25.79]                      | 2.87E-07 | 111.0317744     | per 5 kg/m <sup>2</sup>  |
| BMI       | UK      | 89.03       | SD                   | [55.03, 123.03]                     | 2.87E-07 | 105.9502559     | per SD                   |
| SBP       | UK      | 0.06        | mmHg                 | [0.009, 0.12]                       | 2.27E-02 | 0.714030703     | per 10 mmHg              |
| SBP       | UK      | 1.30        | SD                   | [0.18, 2.42]                        | 2.27E-02 | 1.547066524     | per SD                   |
| SBP       | UK      | 0.74        | mmHg                 | [-0.75, 2.24]                       | 3.31E-01 | 8.806378674     | per 10 mmHg              |
| SBP       | UK      | 14.33       | SD                   | [-14.57, 43.22]                     | 3.31E-01 | 17.0534333      | per SD                   |
| WC        | NL      | 0.80        | cm                   | [0.03, 1.57]                        | 4.11E-02 | 129.907936      | per 10 cm                |
| WC        | NL      | 11.24       | SD                   | [0.43, 23.21]                       | 4.11E-02 | 182.5206501     | per SD                   |
| WC        | NL      | 0.81        | cm                   | [-0.39, 2.02]                       | 1.85E-01 | 131.5317852     | per 10 cm                |
| WC        | NL      | 10.63       | SD                   | [-4.72, 28.45]                      | 1.85E-01 | 172.61517       | per SD                   |
| BMI       | NL      | 3.22        | kg/m <sup>2</sup>    | [0.59, 5.91]                        | 1.60E-02 | 261.4397212     | per 5 kg/m <sup>2</sup>  |
| BMI       | NL      | 16.31       | SD                   | [2.86, 31.52]                       | 1.60E-02 | 264.8498045     | per SD                   |
| SBP       | NL      | 0.03        | mmHg                 | [0.01, 0.05]                        | 7.69E-03 | 4.8715476       | per 10 mmHg              |
| SBP       | NL      | 0.62        | SD                   | [0.16, 1.08]                        | 7.69E-03 | 10.06786504     | per SD                   |
| SBP       | NL      | 0.54        | mmHg                 | [-0.10, 1.190]                      | 9.75E-02 | 87.6878568      | per 10 mmHg              |
| SBP       | NL      | 11.00       | SD                   | [-1.89, 25.59]                      | 9.75E-02 | 178.623412      | per SD                   |

Supplementary Table 5. Genetic correlation between Finland, United Kingdom, and Netherlands calculated using LDSC. LDSC calculated genetic correlation based on the deviation between chi-square statistics compared to the expected deviation assuming the null hypothesis.

| Country | Cost           | Total observed scale h2 (standard error) | Lambda GC | Mean chi <sup>2</sup> | Intercept (standard error) | Ratio                          |
|---------|----------------|------------------------------------------|-----------|-----------------------|----------------------------|--------------------------------|
| FI      | Total          | 0.0649 (0.0034)                          | 1.6831    | 1.7576                | 1.2246 (0.0182)            | 0.2965 (0.024)                 |
| FI      | Primary care   | 0.0298 (0.0027)                          | 1.3824    | 1.4025                | 1.1589 (0.013)             | 0.3971 (0.0323)                |
| FI      | Secondary care | 0.0511 (0.0018)                          | 1.4998    | 1.5337                | 1.1604 (0.0099)            | 0.3006 (0.0185)                |
| FI      | Medication     | 0.0706 (0.0036)                          | 1.7491    | 1.8654                | 1.2828 (0.0189)            | 0.3268 (0.0219)                |
| UK      | Secondary care | 0.0168 (0.0018)                          | 1.0957    | 1.118                 | 1.0177 (0.007)             | 0.1499 (0.0592)                |
| NL      | Total          | -0.004 (0.0346)                          | 1.0195    | 1.0231                | 1.0244 (0.0083)            | 1.0563 (0.3572)                |
| NL      | Primary care   | 0.0451 (0.0368)                          | 0.9668    | 0.9941                | 0.9794 (0.0087)            | NA (mean chi <sup>2</sup> < 1) |
| NL      | Secondary care | -0.0015 (0.0362)                         | 1.0046    | 1.0046                | 1.0051 (0.0083)            | 1.1073 (1.7785)                |
| NL      | Medication     | -0.0059 (0.0354)                         | 1.0315    | 1.0275                | 1.0294 (0.0088)            | 1.0686 (0.3192)                |

| Comparison                | Genetic correlation | Stanford error | Z-score | P-value  |
|---------------------------|---------------------|----------------|---------|----------|
| FI-UK secondary care cost | 0.804               | 0.05492        | 14.64   | 1.61E-48 |
| FI-NL total cost          | NA                  | NA             | NA      | NA       |
| FI-NL primary care cost   | 0.7694              | 0.3387         | 2.2717  | 0.0231   |
| FI-NL secondary care cost | NA                  | NA             | NA      | NA       |
| FI-NL medication cost     | NA                  | NA             | NA      | NA       |

*Supplementary Table 6. Mendelian Randomization results for reweighted FinnGen cohort. Mendelian Randomization models produced effect estimates, standard errors, and p-values of causal effects of exposures and outcomes. P-values were adjusted for multiple hypothesis testing with the Bonferroni correction.*

| Exposure                | Method                    | N SNPs | Beta association | Standard error | P-value     | Percent change | Confidence interval for percent change |
|-------------------------|---------------------------|--------|------------------|----------------|-------------|----------------|----------------------------------------|
| Waist circumference     | Inverse variance weighted | 192    | 0.204104803      | 0.024728054    | 1.53E-16    | 22.64          | [16.84, 28.73]                         |
| Waist circumference     | Inverse variance weighted | 192    | 0.015207642      | 0.001842462    | 1.53E-16    | 1.53           | [1.17, 1.9]                            |
| Body mass index         | Inverse variance weighted | 63     | 0.14635652       | 0.02178195     | 1.83E-11    | 15.76          | [10.92, 20.81]                         |
| Body mass index         | Inverse variance weighted | 63     | 0.030682709      | 0.004566447    | 1.83E-11    | 3.12           | [2.2, 4.04]                            |
| Waist circumference     | Weighted median           | 192    | 0.184488193      | 0.028344169    | 7.57E-11    | 20.26          | [13.76, 27.13]                         |
| Waist circumference     | Weighted median           | 192    | 0.013746028      | 0.002138211    | 1.29E-10    | 1.38           | [0.96, 1.81]                           |
| Waist circumference     | Weighted mode             | 192    | 0.206982907      | 0.041381119    | 1.28E-06    | 23             | [13.41, 33.39]                         |
| Body mass index         | Weighted median           | 63     | 0.117052329      | 0.025401271    | 4.06E-06    | 12.42          | [6.96, 18.16]                          |
| Waist circumference     | Weighted mode             | 192    | 0.015422086      | 0.003272279    | 4.69E-06    | 1.55           | [0.9, 2.21]                            |
| Body mass index         | Weighted median           | 63     | 0.024539272      | 0.005363483    | 4.76E-06    | 2.48           | [1.41, 3.57]                           |
| Systolic blood pressure | Weighted median           | 130    | 0.006124076      | 0.001363666    | 7.09E-06    | 0.61           | [0.35, 0.88]                           |
| Systolic blood pressure | Inverse variance weighted | 130    | 0.120259456      | 0.027410286    | 1.15E-05    | 12.78          | [6.88, 19]                             |
| Systolic blood pressure | Inverse variance weighted | 130    | 0.006222645      | 0.001418304    | 1.15E-05    | 0.62           | [0.34, 0.9]                            |
| Systolic blood pressure | Weighted median           | 130    | 0.118354501      | 0.027492358    | 1.67E-05    | 12.56          | [6.66, 18.8]                           |
| Waist circumference     | Simple mode               | 192    | 0.268090753      | 0.073968057    | 0.000371312 | 30.75          | [13.1, 51.14]                          |
| Waist circumference     | Simple mode               | 192    | 0.01997517       | 0.00572225     | 0.000598077 | 2.02           | [0.88, 3.17]                           |
| Body mass index         | Weighted mode             | 63     | 0.023356732      | 0.007814773    | 0.004010823 | 2.36           | [0.81, 3.94]                           |
| Body mass index         | Weighted mode             | 63     | 0.111411612      | 0.037986043    | 0.00469967  | 11.79          | [3.77, 20.43]                          |
| Systolic blood pressure | MR Egger                  | 130    | 0.013284226      | 0.004759922    | 0.006062174 | 1.34           | [0.4, 2.29]                            |
| Systolic blood pressure | MR Egger                  | 130    | 0.256732277      | 0.091990722    | 0.006062174 | 29.27          | [7.94, 54.81]                          |
| Body mass index         | MR Egger                  | 63     | 0.031606496      | 0.013524084    | 0.022735747 | 3.21           | [0.51, 5.98]                           |
| Body mass index         | MR Egger                  | 63     | 0.150762988      | 0.06450988     | 0.022735747 | 16.27          | [2.46, 31.94]                          |
| Waist circumference     | MR Egger                  | 192    | 0.146678628      | 0.074351379    | 0.049971493 | 15.8           | [0.1, 33.96]                           |
| Waist circumference     | MR Egger                  | 192    | 0.010928876      | 0.005539846    | 0.049971493 | 1.1            | [0.01, 2.2]                            |
| Systolic blood pressure | Weighted mode             | 130    | 0.109025055      | 0.055728594    | 0.052583655 | 11.52          | [-0.02, 24.39]                         |
| Systolic blood pressure | Weighted mode             | 130    | 0.005641338      | 0.002964857    | 0.05930383  | 0.57           | [-0.02, 1.15]                          |
| Body mass index         | Simple mode               | 63     | 0.088251411      | 0.054838629    | 0.112632844 | 9.23           | [-1.9, 21.62]                          |
| Body mass index         | Simple mode               | 63     | 0.018501344      | 0.012057474    | 0.130011593 | 1.87           | [-0.51, 4.3]                           |
| Systolic blood pressure | Simple mode               | 130    | 0.022490297      | 0.076250349    | 0.768503662 | 2.27           | [-11.92, 18.76]                        |
| Systolic blood pressure | Simple mode               | 130    | 0.001163727      | 0.004103274    | 0.777164468 | 0.12           | [-0.69, 0.92]                          |

Supplementary Table 7. Multivariable Mendelian Randomization results. Mendelian Randomization models produced effect estimates, standard errors, and p-values of causal effects of exposures and outcomes. P-values were adjusted for multiple hypothesis testing with the Bonferroni correction.

| Exposure (adjustment)                                           | N SNPs | Beta association | Standard error | P-value     | Percent change | Confidence interval for percent change |
|-----------------------------------------------------------------|--------|------------------|----------------|-------------|----------------|----------------------------------------|
| Systolic blood pressure                                         | 146    | 0.122910265      | 0.019480779    | 2.80E-10    | 13.08          | [8.84, 17.48]                          |
| Systolic blood pressure (Back pain)                             | 141    | 0.137259865      | 0.019481943    | 1.85E-12    | 14.71          | [10.41, 19.18]                         |
| Systolic blood pressure (Back pain)                             | 6      | 0.402395219      | 0.165252438    | 0.014890412 | 49.54          | [8.17, 106.74]                         |
| Systolic blood pressure (Chronic ischemic heart disease)        | 140    | 0.117040775      | 0.020656652    | 1.46E-08    | 12.42          | [7.96, 17.06]                          |
| Systolic blood pressure (Chronic ischemic heart disease)        | 9      | 0.490443393      | 0.325946778    | 0.132408108 | 63.3           | [-13.79, 209.35]                       |
| Systolic blood pressure (Type 2 diabetes)                       | 31     | 0.562597966      | 0.179663404    | 0.001739751 | 75.52          | [23.42, 149.61]                        |
| Systolic blood pressure (Type 2 diabetes)                       | 134    | 0.117334121      | 0.023976784    | 9.90E-07    | 12.45          | [7.29, 17.86]                          |
| Systolic blood pressure (Chronic obstructive pulmonary disease) | 142    | 0.123009287      | 0.020044428    | 8.42E-10    | 13.09          | [8.73, 17.62]                          |
| Systolic blood pressure (Chronic obstructive pulmonary disease) | 0      | 1.530639761      | 2.501787549    | 0.540657887 | 362.11         | [-96.57, 62174.89]                     |
| Systolic blood pressure (Stroke)                                | 142    | 0.090795774      | 0.020723857    | 1.18E-05    | 9.5            | [5.15, 14.04]                          |
| Systolic blood pressure (Stroke)                                | 1      | 3.655106515      | 0.911265608    | 6.05E-05    | 3767.16        | [548.2, 22971.59]                      |
| Systolic blood pressure (Blood pressure medication)             | 127    | 0.037374119      | 0.031720892    | 0.238709803 | 3.81           | [-2.45, 10.47]                         |
| Systolic blood pressure (Blood pressure medication)             | 68     | 0.23510217       | 0.086576174    | 0.006616523 | 26.5           | [6.76, 49.9]                           |
| Systolic blood pressure (All)                                   | 27     | 0.459606406      | 0.158018571    | 0.003630981 | 58.35          | [16.17, 115.83]                        |
| Systolic blood pressure (All)                                   | 120    | 0.055467051      | 0.036945512    | 0.133272706 | 5.7            | [-1.68, 13.64]                         |
| Systolic blood pressure (All)                                   | 4      | 0.532909462      | 0.17123401     | 0.001857171 | 70.39          | [21.81, 138.34]                        |
| Systolic blood pressure (All)                                   | 9      | -0.033505085     | 0.355652629    | 0.924944462 | -3.3           | [-51.84, 94.17]                        |
| Systolic blood pressure (All)                                   | 0      | 2.76283842       | 2.189933536    | 0.207089753 | 1484.48        | [-78.33, 115776.28]                    |
| Systolic blood pressure (All)                                   | 66     | 0.084097545      | 0.109622199    | 0.442987594 | 8.77           | [-12.26, 34.85]                        |
| Systolic blood pressure (All)                                   | 0      | 3.087092868      | 0.986816671    | 0.001757998 | 2091.33        | [216.75, 15060.12]                     |
| Body mass index                                                 | 66     | 0.127848707      | 0.015407011    | 1.06E-16    | 13.64          | [10.26, 17.12]                         |
| Body mass index (Back pain)                                     | 65     | 0.116856782      | 0.015456526    | 4.02E-14    | 12.4           | [9.04, 15.85]                          |
| Body mass index (Back pain)                                     | 6      | 0.365900745      | 0.147175881    | 0.012913493 | 44.18          | [8.05, 92.39]                          |
| Body mass index (Chronic ischemic heart disease)                | 62     | 0.12234999       | 0.018034934    | 1.17E-11    | 13.01          | [9.09, 17.98]                          |
| Body mass index (Chronic ischemic heart disease)                | 10     | 0.244999483      | 0.316010902    | 0.438169457 | 27.76          | [-31.23, 137.35]                       |
| Body mass index (Type 2 diabetes)                               | 62     | 0.096968449      | 0.025180776    | 0.000117688 | 10.18          | [4.88, 15.76]                          |
| Body mass index (Type 2 diabetes)                               | 30     | 0.745895457      | 0.177961409    | 2.77E-05    | 110.83         | [48.75, 198.83]                        |
| Body mass index (Chronic obstructive pulmonary disease)         | 65     | 0.126470693      | 0.015609499    | 5.40E-16    | 13.48          | [10.06, 17.01]                         |
| Body mass index (Chronic obstructive pulmonary disease)         | 0      | 0.497060147      | 2.969990629    | 0.86708613  | 64.39          | [-99.51, 55359.7]                      |
| Body mass index (Stroke)                                        | 65     | 0.128663231      | 0.015907781    | 6.06E-16    | 13.73          | [10.24, 17.33]                         |
| Body mass index (Stroke)                                        | 0      | -0.753460968     | 1.153163733    | 0.513507502 | -52.93         | [-95.09, 351.2]                        |
| Body mass index (Blood pressure medication)                     | 54     | 0.096598673      | 0.020035366    | 1.43E-06    | 10.14          | [5.9, 14.55]                           |
| Body mass index (Blood pressure medication)                     | 60     | 0.389751186      | 0.055064039    | 1.46E-12    | 47.66          | [32.55, 64.49]                         |
| Body mass index (All)                                           | 51     | 0.054651821      | 0.023755587    | 0.021414921 | 5.62           | [0.81, 10.65]                          |
| Body mass index (All)                                           | 21     | 0.721296717      | 0.17124299     | 2.53E-05    | 105.71         | [47.06, 187.75]                        |
| Body mass index (All)                                           | 4      | 0.703705715      | 0.201349662    | 0.000474162 | 102.12         | [36.21, 199.92]                        |
| Body mass index (All)                                           | 6      | -0.518399586     | 0.419436346    | 0.216479601 | -40.45         | [-73.83, 35.49]                        |
| Body mass index (All)                                           | 0      | 8.132679532      | 2.652704695    | 0.002170837 | 340290.82      | [1779.1, 61660204.62]                  |
| Body mass index (All)                                           | 55     | 0.265555042      | 0.080976154    | 0.001040197 | 30.42          | [11.28, 52.85]                         |
| Body mass index (All)                                           | 0      | 3.089070444      | 1.188020459    | 0.009317409 | 2095.67        | [113.95, 22433.55]                     |
| Waist circumference                                             | 213    | 0.205264091      | 0.01703222     | 1.90E-33    | 22.78          | [18.75, 26.95]                         |
| Waist circumference (Back pain)                                 | 206    | 0.169971559      | 0.019454333    | 2.39E-18    | 18.53          | [14.09, 23.13]                         |
| Waist circumference (Back pain)                                 | 4      | 0.501044255      | 0.146122812    | 0.000605976 | 65.04          | [23.94, 119.78]                        |
| Waist circumference (Chronic ischemic heart disease)            | 203    | 0.197124449      | 0.0178098      | 1.79E-28    | 21.79          | [17.61, 26.12]                         |
| Waist circumference (Chronic ischemic heart disease)            | 10     | 0.505251208      | 0.330006304    | 0.125760738 | 65.74          | [-13.2, 216.47]                        |
| Waist circumference (Type 2 diabetes)                           | 32     | 0.691777821      | 0.155635892    | 8.80E-06    | 99.73          | [47.22, 170.97]                        |
| Waist circumference (Type 2 diabetes)                           | 191    | 0.164263405      | 0.02199847     | 8.20E-14    | 17.85          | [12.88, 23.05]                         |
| Waist circumference (Chronic obstructive pulmonary disease)     | 207    | 0.20605183       | 0.018255047    | 1.51E-29    | 22.88          | [18.56, 27.36]                         |
| Waist circumference (Chronic obstructive pulmonary disease)     | 1      | -0.850323672     | 1.873014039    | 0.649838319 | -57.27         | [-98.91, 157.9]                        |
| Waist circumference (Stroke)                                    | 207    | 0.195786294      | 0.018089207    | 2.67E-27    | 21.63          | [17.39, 26.02]                         |
| Waist circumference (Stroke)                                    | 1      | 1.208105223      | 0.806721981    | 0.134250618 | 234.71         | [-31.14, 1526.93]                      |
| Waist circumference (Blood pressure medication)                 | 170    | 0.163119674      | 0.018305122    | 5.05E-19    | 17.72          | [13.57, 22.02]                         |
| Waist circumference (Blood pressure medication)                 | 62     | 0.404518534      | 0.054841948    | 1.63E-13    | 49.86          | [34.59, 66.86]                         |
| Waist circumference (All)                                       | 26     | 0.555951057      | 0.157005888    | 0.000398679 | 74.36          | [28.17, 137.19]                        |
| Waist circumference (All)                                       | 156    | 0.082306721      | 0.025058516    | 0.001021342 | 8.58           | [3.37, 14.04]                          |
| Waist circumference (All)                                       | 3      | 0.605319527      | 0.162586242    | 0.00196817  | 83.18          | [33.2, 151.93]                         |
| Waist circumference (All)                                       | 10     | 0.102440911      | 0.344415221    | 0.766134936 | 10.79          | [-43.6, 117.6]                         |
| Waist circumference (All)                                       | 0      | 0.90511267       | 2.041623798    | 0.657527204 | 147.22         | [-95.48, 13419.19]                     |
| Waist circumference (All)                                       | 59     | 0.304253238      | 0.069347137    | 1.15E-05    | 35.56          | [-18.33, 55.3]                         |
| Waist circumference (All)                                       | 0      | 2.029282307      | 0.840352109    | 0.01574385  | 660.86         | [46.55, 3850.28]                       |

**Supplementary Table 8. FinnGen Consortium.**

| Full Name              | Affiliation                                                                                                                                                            | E-mail                                          | Role 1             | Role 2                            |
|------------------------|------------------------------------------------------------------------------------------------------------------------------------------------------------------------|-------------------------------------------------|--------------------|-----------------------------------|
| Aarno Palotie          | Institute for Molecular Medicine Finland (FIMM), HILIFE, University of Helsinki, Helsinki, Finland; Broad Institute of MIT and Harvard; Massachusetts General Hospital | aarno.palotie@helsinki.fi                       | Steering Committee | Steering Committee                |
| Mark Daly              | Institute for Molecular Medicine Finland (FIMM), HILIFE, University of Helsinki, Helsinki, Finland; Broad Institute of MIT and Harvard; Massachusetts General Hospital | mark.daly@helsinki.fi                           | Steering Committee | Steering Committee                |
| Bridget Riley-Gillis   | Abbvie, Chicago, IL, United States                                                                                                                                     | bridget.rileygillis@abbvie.com                  | Steering Committee | Pharmaceutical companies          |
| Howard Jacob           | Abbvie, Chicago, IL, United States                                                                                                                                     | howard.jacob@abbvie.com                         | Steering Committee | Pharmaceutical companies          |
| Dirk Paul              | Astra Zeneca, Cambridge, United Kingdom                                                                                                                                | dirk.paul@astrazeneca.com                       | Steering Committee | Pharmaceutical companies          |
| Athena Matakidou       | Astra Zeneca, Cambridge, United Kingdom                                                                                                                                | athena.x.matakidou@gsk.com                      | Steering Committee | Pharmaceutical companies          |
| Adam Platt             | Astra Zeneca, Cambridge, United Kingdom                                                                                                                                | adam.platt@astrazeneca.com                      | Steering Committee | Pharmaceutical companies          |
| Heiko Runz             | Biogen, Cambridge, MA, United States                                                                                                                                   | heiko.runz@biogen.com                           | Steering Committee | Pharmaceutical companies          |
| Sally John             | Biogen, Cambridge, MA, United States                                                                                                                                   | sally.john@biogen.com                           | Steering Committee | Pharmaceutical companies          |
| George Okafo           | Boehringer Ingelheim, Ingelheim am Rhein, Germany                                                                                                                      | george.okafo@boehringer-ingelheim.com           | Steering Committee | Pharmaceutical companies          |
| Nathan Lawless         | Boehringer Ingelheim, Ingelheim am Rhein, Germany                                                                                                                      | nathan.lawless@boehringer-ingelheim.com         | Steering Committee | Pharmaceutical companies          |
| Heli Salminen-Mankonen | Boehringer Ingelheim, Ingelheim am Rhein, Germany                                                                                                                      | heli.salminen-mankonen@boehringer-ingelheim.com | Steering Committee | Pharmaceutical companies          |
| Robert Plenge          | Bristol Myers Squibb, New York, NY, United States                                                                                                                      | robert.plenge@bms.com                           | Steering Committee | Pharmaceutical companies          |
| Joseph Maranville      | Bristol Myers Squibb, New York, NY, United States                                                                                                                      | joseph.maranville@bms.com                       | Steering Committee | Pharmaceutical companies          |
| Mark McCarthy          | Genentech, San Francisco, CA, United States                                                                                                                            | mccarthy.mark@gene.com                          | Steering Committee | Pharmaceutical companies          |
| Julie Hunkapiller      | Genentech, San Francisco, CA, United States                                                                                                                            | hunkapiller.julie@gene.com                      | Steering Committee | Pharmaceutical companies          |
| Margaret G. Ehm        | GlaxoSmithKline, Collegeville, PA, United States                                                                                                                       | meg.g.ehm@gsk.com                               | Steering Committee | Pharmaceutical companies          |
| Kirsi Auro             | GlaxoSmithKline, Espoo, Finland                                                                                                                                        | kirsi.m.auro@gsk.com                            | Steering Committee | Pharmaceutical companies          |
| Simonne Longerich      | Merck, Kenilworth, NJ, United States                                                                                                                                   | simonne.longerich@merck.com                     | Steering Committee | Pharmaceutical companies          |
| Caroline Fox           | Merck, Kenilworth, NJ, United States                                                                                                                                   | caroline.fox@merck.com                          | Steering Committee | Pharmaceutical companies          |
| Anders Malarstig       | Pfizer, New York, NY, United States                                                                                                                                    | anders.malarstig@pfizer.com                     | Steering Committee | Pharmaceutical companies          |
| Katherine Klinger      | Translational Sciences, Sanofi R&D, Framingham, MA, USA                                                                                                                | katherine.klinger@sanofi.com                    | Steering Committee | Pharmaceutical companies          |
| Deepak Rajpal          | Translational Sciences, Sanofi R&D, Framingham, MA, USA                                                                                                                | deepak.rajpal@sanofi.com                        | Steering Committee | Pharmaceutical companies          |
| Eric Green             | Maze Therapeutics, San Francisco, CA, United States                                                                                                                    | egreen@mazetx.com                               | Steering Committee | Pharmaceutical companies          |
| Robert Graham          | Maze Therapeutics, San Francisco, CA, United States                                                                                                                    | rgraham@mazetx.com                              | Steering Committee | Pharmaceutical companies          |
| Robert Yang            | Janssen Biotech, Beerse, Belgium                                                                                                                                       | ryang31@its.jnj.com                             | Steering Committee | Pharmaceutical companies          |
| Chris O'Donnell        | Novartis Institutes for BioMedical Research, Cambridge, MA, United States                                                                                              | chris.odonnell@novartis.com                     | Steering Committee | Pharmaceutical companies          |
| Tomi P. Mäkelä         | HILIFE, University of Helsinki, Finland, Finland                                                                                                                       | tomi.makela@helsinki.fi                         | Steering Committee | University of Helsinki & Biobanks |
| Jaakko Kaprio          | Institute for Molecular Medicine Finland (FIMM), HILIFE, University of Helsinki, Helsinki, Finland                                                                     | jaakko.kaprio@helsinki.fi                       | Steering Committee | University of Helsinki & Biobanks |
| Petri Virolainen       | Auria Biobank / University of Turku / Hospital District of Southwest Finland, Turku, Finland                                                                           | petri.virolainen@tyks.fi                        | Steering Committee | University of Helsinki & Biobanks |
| Antti Hakanen          | Auria Biobank / University of Turku / Hospital District of Southwest Finland, Turku, Finland                                                                           | antti.hakanen@tyks.fi                           | Steering Committee | University of Helsinki & Biobanks |
| Terhi Kilpi            | THL Biobank / Finnish Institute for Health and Welfare (THL), Helsinki, Finland                                                                                        | terhi.kilpi@thl.fi                              | Steering Committee | University of Helsinki & Biobanks |
| Markus Perola          | THL Biobank / Finnish Institute for Health and Welfare (THL), Helsinki, Finland                                                                                        | markus.perola@thl.fi                            | Steering Committee | University of Helsinki & Biobanks |
| Jukka Partanen         | Finnish Red Cross Blood Service / Finnish Hematology Registry and Clinical Biobank, Helsinki, Finland                                                                  | jukka.partanen@veripalvelu.fi                   | Steering Committee | University of Helsinki & Biobanks |
| Anne Pitkäranta        | Helsinki Biobank / Helsinki University and Hospital District of Helsinki and Uusimaa, Helsinki                                                                         | anne.pitkaranta@hus.fi                          | Steering Committee | University of Helsinki & Biobanks |
| Taneli Raivio          | Helsinki Biobank / Helsinki University and Hospital District of Helsinki and Uusimaa, Helsinki                                                                         | taneli.raivio@hus.fi                            | Steering Committee | University of Helsinki & Biobanks |
| Raisa Serpi            | Northern Finland Biobank Borealis / University of Oulu / Northern Ostrobothnia Hospital District, Oulu, Finland                                                        | raisa.serpi@ppshp.fi                            | Steering Committee | University of Helsinki & Biobanks |
| Tarja Laitinen         | Finnish Clinical Biobank Tampere / University of Tampere / Pirkanmaa Hospital District, Tampere, Finland                                                               | tarja.laitinen@pshp.fi                          | Steering Committee | University of Helsinki & Biobanks |
| Veli-Matti Kosma       | Biobank of Eastern Finland / University of Eastern Finland / Northern Savo Hospital District, Kuopio, Finland                                                          | veli-matti.kosma@uef.fi                         | Steering Committee | University of Helsinki & Biobanks |
| Jari Laukkanen         | Central Finland Biobank / University of Jyväskylä / Central Finland Health Care District, Jyväskylä, Finland                                                           | jari.laukkanen@ksshp.fi                         | Steering Committee | University of Helsinki & Biobanks |
| Marco Hautalahti       | FINBB - Finnish biobank cooperative                                                                                                                                    | marco.hautalahti@finbb.fi                       | Steering Committee | University of Helsinki & Biobanks |
| Outi Tuovila           | Business Finland, Helsinki, Finland                                                                                                                                    | outi.tuovila@businessfinland.fi                 | Steering Committee | Other Experts/ Non-Voting Members |
| Raimo Pakkanen         | Business Finland, Helsinki, Finland                                                                                                                                    | raimo.pakkanen@businessfinland.fi               | Steering Committee | Other Experts/ Non-Voting Members |
| Jeffrey Waring         | Abbvie, Chicago, IL, United States                                                                                                                                     | jeff.waring@abbvie.com                          | Steering Committee | Pharmaceutical companies          |

|                         |                                                                                                                 |                                           |                      |                                   |
|-------------------------|-----------------------------------------------------------------------------------------------------------------|-------------------------------------------|----------------------|-----------------------------------|
| Bridget Riley-Gillis    | Abbvie, Chicago, IL, United States                                                                              | bridget.rileygillis@abbvie.com            | Scientific Committee | Pharmaceutical companies          |
| Fedik Rahimov           | Abbvie, Chicago, IL, United States                                                                              | fedik.rahimov@abbvie.com                  | Scientific Committee | Pharmaceutical companies          |
| Ioanna Tachmazidou      | Astra Zeneca, Cambridge, United Kingdom                                                                         | ioanna.tachmazidou@astrazeneca.com        | Scientific Committee | Pharmaceutical companies          |
| Chia-Yen Chen           | Biogen, Cambridge, MA, United States                                                                            | chiayen.chen@biogen.com                   | Scientific Committee | Pharmaceutical companies          |
| Heiko Runz              | Biogen, Cambridge, MA, United States                                                                            | heiko.runz@biogen.com                     | Scientific Committee | Pharmaceutical companies          |
| Zhihao Ding             | Boehringer Ingelheim, Ingelheim am Rhein, Germany                                                               | zhihao.ding@boehringer-ingelheim.com      | Scientific Committee | Pharmaceutical companies          |
| Marc Jung               | Boehringer Ingelheim, Ingelheim am Rhein, Germany                                                               | marc_oliver.jung@boehringer-ingelheim.com | Scientific Committee | Pharmaceutical companies          |
| Shameek Biswas          | Bristol Myers Squibb, New York, NY, United States                                                               | Shameek.Biswas@bms.com                    | Scientific Committee | Pharmaceutical companies          |
| Rion Pendergrass        | Genentech, San Francisco, CA, United States                                                                     | penders2@gene.com                         | Scientific Committee | Pharmaceutical companies          |
| Julie Hunkapiller       | Genentech, San Francisco, CA, United States                                                                     | hunkapiller.julie@gene.com                | Scientific Committee | Pharmaceutical companies          |
| Margaret G. Ehm         | GlaxoSmithKline, Collegeville, PA, United States                                                                | meg.g.ehm@gsk.com                         | Scientific Committee | Pharmaceutical companies          |
| David Pulford           | GlaxoSmithKline, Stevenage, United Kingdom                                                                      | david.x.pulford@gsk.com                   | Scientific Committee | Pharmaceutical companies          |
| Neha Raghavan           | Merck, Kenilworth, NJ, United States                                                                            | neha.raghavan@merck.com                   | Scientific Committee | Pharmaceutical companies          |
| Adriana Huertas-Vazquez | Merck, Kenilworth, NJ, United States                                                                            | adriana.huertas.vazquez@merck.com         | Scientific Committee | Pharmaceutical companies          |
| Jae-Hoon Sul            | Merck, Kenilworth, NJ, United States                                                                            | jae.hoon.sul@merck.com                    | Scientific Committee | Pharmaceutical companies          |
| Anders Målarstig        | Pfizer, New York, NY, United States                                                                             | anders.malarstig@pfizer.com               | Scientific Committee | Pharmaceutical companies          |
| Xinli Hu                | Pfizer, New York, NY, United States                                                                             | xinli.hu@pfizer.com                       | Scientific Committee | Pharmaceutical companies          |
| Katherine Klinger       | Translational Sciences, Sanofi R&D, Framingham, MA, USA                                                         | katherine.klinger@sanofi.com              | Scientific Committee | Pharmaceutical companies          |
| Robert Graham           | Maze Therapeutics, San Francisco, CA, United States                                                             | rgraham@mazetx.com                        | Scientific Committee | Pharmaceutical companies          |
| Eric Green              | Maze Therapeutics, San Francisco, CA, United States                                                             | egreen@mazetx.com                         | Scientific Committee | Pharmaceutical companies          |
| Sahar Mozaffari         | Maze Therapeutics, San Francisco, CA, United States                                                             | smozaffari@mazetx.com                     | Scientific Committee | Pharmaceutical companies          |
| Dawn Waterworth         | Janssen Research & Development, LLC, Spring House, PA, United States                                            | dwaterwo@its.jnj.com                      | Scientific Committee | Pharmaceutical companies          |
| Nicole Renaud           | Novartis Institutes for BioMedical Research, Cambridge, MA, United States                                       | nicole.renaud@novartis.com                | Scientific Committee | Pharmaceutical companies          |
| Ma'en Obeidat           | Novartis Institutes for BioMedical Research, Cambridge, MA, United States                                       | maen.obeidat@novartis.com                 | Scientific Committee | Pharmaceutical companies          |
| Samuli Ripatti          | Institute for Molecular Medicine Finland (FIMM), HiLIFE, University of Helsinki, Helsinki, Finland              | samuli.ripatti@helsinki.fi                | Scientific Committee | University of Helsinki & Biobanks |
| Johanna Schleutker      | Auria Biobank / Univ. of Turku / Hospital District of Southwest Finland, Turku, Finland                         | johanna.schleutker@utu.fi                 | Scientific Committee | University of Helsinki & Biobanks |
| Markus Perola           | THL Biobank / Finnish Institute for Health and Welfare (THL), Helsinki, Finland                                 | markus.perola@thl.fi                      | Scientific Committee | University of Helsinki & Biobanks |
| Mikko Arvas             | Finnish Red Cross Blood Service / Finnish Hematology Registry and Clinical Biobank, Helsinki, Finland           | mikko.arvas@veripalvelu.fi                | Scientific Committee | University of Helsinki & Biobanks |
| Olli Carpén             | Helsinki Biobank / Helsinki University and Hospital District of Helsinki and Uusimaa, Helsinki                  | olli.carpen@helsinki.fi                   | Scientific Committee | University of Helsinki & Biobanks |
| Reetta Hinttala         | Northern Finland Biobank Borealis / University of Oulu / Northern Ostrobothnia Hospital District, Oulu, Finland | reetta.hinttala@oulu.fi                   | Scientific Committee | University of Helsinki & Biobanks |
| Johannes Kettunen       | Northern Finland Biobank Borealis / University of Oulu / Northern Ostrobothnia Hospital District, Oulu, Finland | johannes.kettunen@oulu.fi                 | Scientific Committee | University of Helsinki & Biobanks |
| Arto Mannermaa          | Biobank of Eastern Finland / University of Eastern Finland / Northern Savo Hospital District, Kuopio, Finland   | arto.mannermaa@uef.fi                     | Scientific Committee | University of Helsinki & Biobanks |
| Katriina Aalto-Setälä   | Faculty of Medicine and Health Technology, Tampere University, Tampere, Finland                                 | katriina.aalto-setala@tuni.fi             | Scientific Committee | University of Helsinki & Biobanks |
| Mika Kahönen            | Finnish Clinical Biobank Tampere / University of Tampere / Pirkanmaa Hospital District, Tampere, Finland        | mika.kahonen@uta.fi                       | Scientific Committee | University of Helsinki & Biobanks |
| Jari Laukkanen          | Central Finland Biobank / University of Jyväskylä / Central Finland Health Care District, Jyväskylä, Finland    | jari.laukkanen@ksshp.fi                   | Scientific Committee | University of Helsinki & Biobanks |
| Johanna Mäkelä          | FINBB - Finnish biobank cooperative                                                                             | johanna.makela@finbb.fi                   | Scientific Committee | University of Helsinki & Biobanks |
| Reetta Kalviainen       | Northern Savo Hospital District, Kuopio, Finland                                                                | reetta.kalviainen@kuh.fi                  | Clinical Groups      | Neurology Group                   |
| Valtteri Julkunen       | Northern Savo Hospital District, Kuopio, Finland                                                                | valtteri.julkunen@kuh.fi                  | Clinical Groups      | Neurology Group                   |
| Hilkka Soiminen         | Northern Savo Hospital District, Kuopio, Finland                                                                | hilkka.soiminen@uef.fi                    | Clinical Groups      | Neurology Group                   |
| Anne Remes              | Northern Ostrobothnia Hospital District, Oulu, Finland                                                          | anne.remes@oulu.fi                        | Clinical Groups      | Neurology Group                   |
| Mikko Hiltunen          | University of Eastern Finland, Kuopio, Finland                                                                  | mikko.hiltunen@uef.fi                     | Clinical Groups      | Neurology Group                   |
| Jukka Peltola           | Pirkanmaa Hospital District, Tampere, Finland                                                                   | jukka.peltola@pshp.fi                     | Clinical Groups      | Neurology Group                   |
| Minna Raivio            | Hospital District of Helsinki and Uusimaa, Helsinki, Finland                                                    | minna.raivio@geri.fi                      | Clinical Groups      | Neurology Group                   |
| Pentti Tienari          | Hospital District of Helsinki and Uusimaa, Helsinki, Finland                                                    | pentti.tienari@hus.fi                     | Clinical Groups      | Neurology Group                   |
| Juha Rinne              | Hospital District of Southwest Finland, Turku, Finland                                                          | juha.rinne@tyks.fi                        | Clinical Groups      | Neurology Group                   |
| Roosa Kallionpää        | Hospital District of Southwest Finland, Turku, Finland                                                          | roosa.kallionpaa@tyks.fi                  | Clinical Groups      | Neurology Group                   |
| Juulia Partanen         | Institute for Molecular Medicine Finland, HiLIFE, University of Helsinki, Finland                               | juulia.partanen@helsinki.fi               | Clinical Groups      | Neurology Group                   |
| Ali Abbasi              | Abbvie, Chicago, IL, United States                                                                              | ali.abbasi@abbvie.com                     | Clinical Groups      | Neurology Group                   |
| Adam Ziemann            | Abbvie, Chicago, IL, United States                                                                              | adam.ziemann@abbvie.com                   | Clinical Groups      | Neurology Group                   |
| Nizar Smaoui            | Abbvie, Chicago, IL, United States                                                                              | nizar.smaoui@abbvie.com                   | Clinical Groups      | Neurology Group                   |
| Anne Lehtonen           | Abbvie, Chicago, IL, United States                                                                              | anne.lehtonen@abbvie.com                  | Clinical Groups      | Neurology Group                   |
| Susan Eaton             | Biogen, Cambridge, MA, United States                                                                            | susan.eaton@biogen.com                    | Clinical Groups      | Neurology Group                   |
| Heiko Runz              | Biogen, Cambridge, MA, United States                                                                            | heiko.runz@biogen.com                     | Clinical Groups      | Neurology Group                   |
| Sanni Lahdenperä        | Biogen, Cambridge, MA, United States                                                                            | sanni.lahdenpera@biogen.com               | Clinical Groups      | Neurology Group                   |
| Shameek Biswas          | Bristol Myers Squibb, New York, NY, United States                                                               | shameek.biswas@bms.com                    | Clinical Groups      | Neurology Group                   |
| Julie Hunkapiller       | Genentech, San Francisco, CA, United States                                                                     | hunkapiller.julie@gene.com                | Clinical Groups      | Neurology Group                   |
| Natalie Bowers          | Genentech, San Francisco, CA, United States                                                                     | bowersn1@gene.com                         | Clinical Groups      | Neurology Group                   |
| Edmond Teng             | Genentech, San Francisco, CA, United States                                                                     | teng.edmond@gene.com                      | Clinical Groups      | Neurology Group                   |
| Rion Pendergrass        | Genentech, San Francisco, CA, United States                                                                     | penders2@gene.com                         | Clinical Groups      | Neurology Group                   |

|                         |                                                                                                                                                                         |                                             |                 |                        |
|-------------------------|-------------------------------------------------------------------------------------------------------------------------------------------------------------------------|---------------------------------------------|-----------------|------------------------|
| Fanli Xu                | GlaxoSmithKline, Brentford, United Kingdom                                                                                                                              | chun-fang.2.xu@gsk.com                      | Clinical Groups | Neurology Group        |
| David Pulford           | GlaxoSmithKline, Stevenage, United Kingdom                                                                                                                              | david.x.pulford@gsk.com                     | Clinical Groups | Neurology Group        |
| Kirsi Auro              | GlaxoSmithKline, Espoo, Finland                                                                                                                                         | kirsi.m.auro@gsk.com                        | Clinical Groups | Neurology Group        |
| Laura Addis             | GlaxoSmithKline, Brentford, United Kingdom                                                                                                                              | laura.x.addis@gsk.com                       | Clinical Groups | Neurology Group        |
| John Eicher             | GlaxoSmithKline, Brentford, United Kingdom                                                                                                                              | john.d.eicher@gsk.com                       | Clinical Groups | Neurology Group        |
| Qingqin S Li            | Janssen Research & Development, LLC, Titusville, NJ 08560, United States                                                                                                | QL12@its.inj.com                            | Clinical Groups | Neurology Group        |
| Karen He                | Janssen Research & Development, LLC, Spring House, PA, United States                                                                                                    | khe2@its.inj.com                            | Clinical Groups | Neurology Group        |
| Ekaterina Khramtsova    | Janssen Research & Development, LLC, Spring House, PA, United States                                                                                                    | ekhrams@its.inj.com                         | Clinical Groups | Neurology Group        |
| Neha Raghavan           | Merck, Kenilworth, NJ, United States                                                                                                                                    | neha.raghavan@merck.com                     | Clinical Groups | Neurology Group        |
| Martti Färkkilä         | Hospital District of Helsinki and Uusimaa, Helsinki, Finland                                                                                                            | martti.farkkila@hus.fi                      | Clinical Groups | Gastroenterology Group |
| Jukka Koskela           | Hospital District of Helsinki and Uusimaa, Helsinki, Finland                                                                                                            | jukka.koskela@helsinki.fi                   | Clinical Groups | Gastroenterology Group |
| Sampsa Pikkarainen      | Hospital District of Helsinki and Uusimaa, Helsinki, Finland                                                                                                            | sampsa.pikkarainen@hus.fi                   | Clinical Groups | Gastroenterology Group |
| Airi Jussila            | Pirkanmaa Hospital District, Tampere, Finland                                                                                                                           | airi.jussila@pshp.fi                        | Clinical Groups | Gastroenterology Group |
| Katri Kaukinen          | Pirkanmaa Hospital District, Tampere, Finland                                                                                                                           | katri.kaukinen@tuni.fi                      | Clinical Groups | Gastroenterology Group |
| Timo Blomster           | Northern Ostrobothnia Hospital District, Oulu, Finland                                                                                                                  | timo.blomster@ppshp.fi                      | Clinical Groups | Gastroenterology Group |
| Mikko Kiviniemi         | Northern Savo Hospital District, Kuopio, Finland                                                                                                                        | mikko.kiviniemi@kuh.fi                      | Clinical Groups | Gastroenterology Group |
| Markku Voutilainen      | Hospital District of Southwest Finland, Turku, Finland                                                                                                                  | markku.voutilainen@tyks.fi                  | Clinical Groups | Gastroenterology Group |
| Mark Daly               | Institute for Molecular Medicine, Finland (FIMM), HILIFE, University of Helsinki, Helsinki, Finland; Broad Institute of MIT and Harvard; Massachusetts General Hospital | mark.daly@helsinki.fi                       | Clinical Groups | Gastroenterology Group |
| Ali Abbasi              | Abbvie, Chicago, IL, United States                                                                                                                                      | ali.abbasi@abbvie.com                       | Clinical Groups | Gastroenterology Group |
| Jeffrey Waring          | Abbvie, Chicago, IL, United States                                                                                                                                      | jeff.waring@abbvie.com                      | Clinical Groups | Gastroenterology Group |
| Nizar Smaoui            | Abbvie, Chicago, IL, United States                                                                                                                                      | nizar.smaoui@abbvie.com                     | Clinical Groups | Gastroenterology Group |
| Fedik Rahimov           | Abbvie, Chicago, IL, United States                                                                                                                                      | fedik.rahimov@abbvie.com                    | Clinical Groups | Gastroenterology Group |
| Anne Lehtonen           | Abbvie, Chicago, IL, United States                                                                                                                                      | anne.lehtonen@abbvie.com                    | Clinical Groups | Gastroenterology Group |
| Tim Lu                  | Genentech, San Francisco, CA, United States                                                                                                                             | lut8@gene.com                               | Clinical Groups | Gastroenterology Group |
| Natalie Bowers          | Genentech, San Francisco, CA, United States                                                                                                                             | bowersn1@gene.com                           | Clinical Groups | Gastroenterology Group |
| Rion Pendergrass        | Genentech, San Francisco, CA, United States                                                                                                                             | penders2@gene.com                           | Clinical Groups | Gastroenterology Group |
| Linda McCarthy          | GlaxoSmithKline, Brentford, United Kingdom                                                                                                                              | linda.c.mccarthy@gsk.com                    | Clinical Groups | Gastroenterology Group |
| Amy Hart                | Janssen Research & Development, LLC, Spring House, PA, United States                                                                                                    | ahart13@its.inj.com                         | Clinical Groups | Gastroenterology Group |
| Meijian Guan            | Janssen Research & Development, LLC, Spring House, PA, United States                                                                                                    | mquan4@its.inj.com                          | Clinical Groups | Gastroenterology Group |
| Jason Miller            | Merck, Kenilworth, NJ, United States                                                                                                                                    | jason.miller4@merck.com                     | Clinical Groups | Gastroenterology Group |
| Kirsi Kalpala           | Pfizer, New York, NY, United States                                                                                                                                     | kirsi.kalpala@pfizer.com                    | Clinical Groups | Gastroenterology Group |
| Melissa Miller          | Pfizer, New York, NY, United States                                                                                                                                     | melissa.r.miller@pfizer.com                 | Clinical Groups | Gastroenterology Group |
| Xinli Hu                | Pfizer, New York, NY, United States                                                                                                                                     | xinli.hu@pfizer.com                         | Clinical Groups | Gastroenterology Group |
| Kari Eklund             | Hospital District of Helsinki and Uusimaa, Helsinki, Finland                                                                                                            | kari.eklund@hus.fi                          | Clinical Groups | Rheumatology Group     |
| Antti Palomäki          | Hospital District of Southwest Finland, Turku, Finland                                                                                                                  | ajpalo@utu.fi                               | Clinical Groups | Rheumatology Group     |
| Pia Isomäki             | Pirkanmaa Hospital District, Tampere, Finland                                                                                                                           | pia.isomaki@pshp.fi                         | Clinical Groups | Rheumatology Group     |
| Laura Piriä             | Hospital District of Southwest Finland, Turku, Finland                                                                                                                  | laura.pirila@fimnet.fi;laura.pirila@tyks.fi | Clinical Groups | Rheumatology Group     |
| Oili Kaipainen-Seppänen | Northern Savo Hospital District, Kuopio, Finland                                                                                                                        | oili.kaipainen-seppanen@kuh.fi              | Clinical Groups | Rheumatology Group     |
| Johanna Huhtakangas     | Northern Ostrobothnia Hospital District, Oulu, Finland                                                                                                                  | johanna.huhtakangas@kuh.fi                  | Clinical Groups | Rheumatology Group     |
| Nina Mars               | Institute for Molecular Medicine Finland (FIMM), HILIFE, University of Helsinki, Helsinki, Finland                                                                      | nina.mars@helsinki.fi                       | Clinical Groups | Rheumatology Group     |
| Ali Abbasi              | Abbvie, Chicago, IL, United States                                                                                                                                      | ali.abbasi@abbvie.com                       | Clinical Groups | Rheumatology Group     |
| Jeffrey Waring          | Abbvie, Chicago, IL, United States                                                                                                                                      | jeff.waring@abbvie.com                      | Clinical Groups | Rheumatology Group     |
| Fedik Rahimov           | Abbvie, Chicago, IL, United States                                                                                                                                      | fedik.rahimov@abbvie.com                    | Clinical Groups | Rheumatology Group     |
| Apinya Lertratanakul    | Abbvie, Chicago, IL, United States                                                                                                                                      | apinya.lertratanakul@abbvie.com             | Clinical Groups | Rheumatology Group     |
| Nizar Smaoui            | Abbvie, Chicago, IL, United States                                                                                                                                      | nizar.smaoui@abbvie.com                     | Clinical Groups | Rheumatology Group     |
| Anne Lehtonen           | Abbvie, Chicago, IL, United States                                                                                                                                      | anne.lehtonen@abbvie.com                    | Clinical Groups | Rheumatology Group     |
| Marla Hochfeld          | Bristol Myers Squibb, New York, NY, United States                                                                                                                       | mhochfeld@celgene.com                       | Clinical Groups | Rheumatology Group     |
| Natalie Bowers          | Genentech, San Francisco, CA, United States                                                                                                                             | bowersn1@gene.com                           | Clinical Groups | Rheumatology Group     |
| Rion Pendergrass        | Genentech, San Francisco, CA, United States                                                                                                                             | penders2@gene.com                           | Clinical Groups | Rheumatology Group     |
| Jorge Esparza Gordillo  | GlaxoSmithKline, Brentford, United Kingdom                                                                                                                              | jorge.x.esparza-gordillo@gsk.com            | Clinical Groups | Rheumatology Group     |
| Kirsi Auro              | GlaxoSmithKline, Espoo, Finland                                                                                                                                         | kirsi.m.auro@gsk.com                        | Clinical Groups | Rheumatology Group     |
| Dawn Waterworth         | Janssen Research & Development, LLC, Spring House, PA, United States                                                                                                    | dwaterwo@its.inj.com                        | Clinical Groups | Rheumatology Group     |
| Fabiana Farias          | Merck, Kenilworth, NJ, United States                                                                                                                                    | fabiana.farias@merck.com                    | Clinical Groups | Rheumatology Group     |
| Kirsi Kalpala           | Pfizer, New York, NY, United States                                                                                                                                     | kirsi.kalpala@pfizer.com                    | Clinical Groups | Rheumatology Group     |
| Nan Bing                | Pfizer, New York, NY, United States                                                                                                                                     | nan.bing@pfizer.com                         | Clinical Groups | Rheumatology Group     |
| Xinli Hu                | Pfizer, New York, NY, United States                                                                                                                                     | xinli.hu@pfizer.com                         | Clinical Groups | Rheumatology Group     |
| Tarja Laitinen          | Pirkanmaa Hospital District, Tampere, Finland                                                                                                                           | tarja.laitinen@pshp.fi                      | Clinical Groups | Pulmonology Group      |

|                       |                                                                                                                                                                                             |                                   |                 |                                |
|-----------------------|---------------------------------------------------------------------------------------------------------------------------------------------------------------------------------------------|-----------------------------------|-----------------|--------------------------------|
| Margit Pelkonen       | Northern Savo Hospital District, Kuopio, Finland                                                                                                                                            | margit.pelkonen@kuh.fi            | Clinical Groups | Pulmonology Group              |
| Paula Kauppi          | Hospital District of Helsinki and Uusimaa, Helsinki, Finland                                                                                                                                | paula.kauppi@hus.fi               | Clinical Groups | Pulmonology Group              |
| Hannu Kankaanranta    | University of Gothenburg, Gothenburg, Sweden/ Seinäjoki Central Hospital, Seinäjoki, Finland/ Tampere University, Tampere, Finland                                                          | hannu.kankaanranta@tuni.fi        | Clinical Groups | Pulmonology Group              |
| Terttu Harju          | Northern Ostrobothnia Hospital District, Oulu, Finland                                                                                                                                      | terttu.harju@oulu.fi              | Clinical Groups | Pulmonology Group              |
| Riitta Lahesmaa       | Hospital District of Southwest Finland, Turku, Finland                                                                                                                                      | rilahes@utu.fi                    | Clinical Groups | Pulmonology Group              |
| Nizar Smaoui          | Abbvie, Chicago, IL, United States                                                                                                                                                          | nizar.smaoui@abbvie.com           | Clinical Groups | Pulmonology Group              |
| Glenda Lassi          | Astra Zeneca, Cambridge, United Kingdom                                                                                                                                                     | glenda.lassi@astrazeneca.com      | Clinical Groups | Pulmonology Group              |
| Susan Eaton           | Biogen, Cambridge, MA, United States                                                                                                                                                        | susan.eaton@biogen.com            | Clinical Groups | Pulmonology Group              |
| Hubert Chen           | Genentech, San Francisco, CA, United States                                                                                                                                                 | chenh37@gene.com                  | Clinical Groups | Pulmonology Group              |
| Rion Pendergrass      | Genentech, San Francisco, CA, United States                                                                                                                                                 | penders2@gene.com                 | Clinical Groups | Pulmonology Group              |
| Natalie Bowers        | Genentech, San Francisco, CA, United States                                                                                                                                                 | bowersn1@gene.com                 | Clinical Groups | Pulmonology Group              |
| Joanna Betts          | GlaxoSmithKline, Brentford, United Kingdom                                                                                                                                                  | joanna.c.betts@gsk.com            | Clinical Groups | Pulmonology Group              |
| Kirsi Auro            | GlaxoSmithKline, Espoo, Finland                                                                                                                                                             | kirsi.m.auro@gsk.com              | Clinical Groups | Pulmonology Group              |
| Rajashree Mishra      | GlaxoSmithKline, Brentford, United Kingdom                                                                                                                                                  | rajashree.x.mishra@gsk.com        | Clinical Groups | Pulmonology Group              |
| Majd Mouded           | Novartis, Basel, Switzerland                                                                                                                                                                | majd.mouded@novartis.com          | Clinical Groups | Pulmonology Group              |
| Debby Ngo             | Novartis, Basel, Switzerland                                                                                                                                                                | debby.ngo@novartis.com            | Clinical Groups | Pulmonology Group              |
| Teemu Niiranen        | Finnish Institute for Health and Welfare (THL), Helsinki, Finland                                                                                                                           | teemu.niiranen@thl.fi             | Clinical Groups | Cardiometabolic Diseases Group |
| Felix Vaura           | Finnish Institute for Health and Welfare (THL), Helsinki, Finland                                                                                                                           | fehva@utu.fi                      | Clinical Groups | Cardiometabolic Diseases Group |
| Veikko Salomaa        | Finnish Institute for Health and Welfare (THL), Helsinki, Finland                                                                                                                           | veikko.salomaa@thl.fi             | Clinical Groups | Cardiometabolic Diseases Group |
| Kaj Metsärinne        | Hospital District of Southwest Finland, Turku, Finland                                                                                                                                      | kaj.metsarinne@tyks.fi            | Clinical Groups | Cardiometabolic Diseases Group |
| Jenni Aittokallio     | Hospital District of Southwest Finland, Turku, Finland                                                                                                                                      | jemato@utu.fi                     | Clinical Groups | Cardiometabolic Diseases Group |
| Mika Kähkönen         | Pirkanmaa Hospital District, Tampere, Finland                                                                                                                                               | mika.kahonen@uta.fi               | Clinical Groups | Cardiometabolic Diseases Group |
| Jussi Hernesniemi     | Pirkanmaa Hospital District, Tampere, Finland                                                                                                                                               | jussi.hernesniemi@tuni.fi         | Clinical Groups | Cardiometabolic Diseases Group |
| Daniel Gordin         | Hospital District of Helsinki and Uusimaa, Helsinki, Finland                                                                                                                                | daniel.gordin@hus.fi              | Clinical Groups | Cardiometabolic Diseases Group |
| Juha Sinisalo         | Hospital District of Helsinki and Uusimaa, Helsinki, Finland                                                                                                                                | juha.sinisalo@hus.fi              | Clinical Groups | Cardiometabolic Diseases Group |
| Marja-Riitta Taskinen | Hospital District of Helsinki and Uusimaa, Helsinki, Finland                                                                                                                                | marja-riitta.taskinen@helsinki.fi | Clinical Groups | Cardiometabolic Diseases Group |
| Tiinamajja Tuomi      | Hospital District of Helsinki and Uusimaa, Helsinki, Finland                                                                                                                                | tiinamajja.tuomi@hus.fi           | Clinical Groups | Cardiometabolic Diseases Group |
| Timo Hiltunen         | Hospital District of Helsinki and Uusimaa, Helsinki, Finland                                                                                                                                | timo.hiltunen@hus.fi              | Clinical Groups | Cardiometabolic Diseases Group |
| Jari Laukkanen        | Central Finland Health Care District, Jyväskylä, Finland                                                                                                                                    | jari.laukkanen@ksshp.fi           | Clinical Groups | Cardiometabolic Diseases Group |
| Amanda Elliott        | Institute for Molecular Medicine Finland (FIMM), HiLIFE, University of Helsinki, Helsinki, Finland; Broad Institute, Cambridge, MA, USA and Massachusetts General Hospital, Boston, MA, USA | aelliott@broadinstitute.org       | Clinical Groups | Cardiometabolic Diseases Group |
| Mary Pat Reeve        | Institute for Molecular Medicine Finland (FIMM), HiLIFE, University of Helsinki, Helsinki, Finland                                                                                          | mary.reeve@helsinki.fi            | Clinical Groups | Cardiometabolic Diseases Group |
| Sanni Ruotsalainen    | Institute for Molecular Medicine Finland (FIMM), HiLIFE, University of Helsinki, Helsinki, Finland                                                                                          | sanni.ruotsalainen@helsinki.fi    | Clinical Groups | Cardiometabolic Diseases Group |
| Benjamin Challis      | Astra Zeneca, Cambridge, United Kingdom                                                                                                                                                     | benjamin.challis@astrazeneca.com  | Clinical Groups | Cardiometabolic Diseases Group |
| Dirk Paul             | Astra Zeneca, Cambridge, United Kingdom                                                                                                                                                     | dirk.paul@astrazeneca.com         | Clinical Groups | Cardiometabolic Diseases Group |
| Julie Hunkapiller     | Genentech, San Francisco, CA, United States                                                                                                                                                 | hunkapiller.julie@gene.com        | Clinical Groups | Cardiometabolic Diseases Group |
| Natalie Bowers        | Genentech, San Francisco, CA, United States                                                                                                                                                 | bowersn1@gene.com                 | Clinical Groups | Cardiometabolic Diseases Group |
| Rion Pendergrass      | Genentech, San Francisco, CA, United States                                                                                                                                                 | penders2@gene.com                 | Clinical Groups | Cardiometabolic Diseases Group |
| Audrey Chu            | GlaxoSmithKline, Brentford, United Kingdom                                                                                                                                                  | audrey.y.chu@gsk.com              | Clinical Groups | Cardiometabolic Diseases Group |
| Kirsi Auro            | GlaxoSmithKline, Espoo, Finland                                                                                                                                                             | kirsi.m.auro@gsk.com              | Clinical Groups | Cardiometabolic Diseases Group |
| Dermot Reilly         | Janssen Research & Development, LLC, Boston, MA, United States                                                                                                                              | dreill11@its.jnj.com              | Clinical Groups | Cardiometabolic Diseases Group |
| Mike Mendelson        | Novartis, Boston, MA, United States                                                                                                                                                         | mike.mendelson@novartis.com       | Clinical Groups | Cardiometabolic Diseases Group |
| Jaakko Parkkinen      | Pfizer, New York, NY, United States                                                                                                                                                         | jaakko.parkkinen@pfizer.com       | Clinical Groups | Cardiometabolic Diseases Group |
| Melissa Miller        | Pfizer, New York, NY, United States                                                                                                                                                         | melissa.r.miller@pfizer.com       | Clinical Groups | Cardiometabolic Diseases Group |
| Tuomo Meretoja        | Hospital District of Helsinki and Uusimaa, Helsinki, Finland                                                                                                                                | tuomo.meretoja@hus.fi             | Clinical Groups | Oncology Group                 |
| Heikki Joensuu        | Hospital District of Helsinki and Uusimaa, Helsinki, Finland                                                                                                                                | heikki.joensuu@hus.fi             | Clinical Groups | Oncology Group                 |
| Olli Carpen           | Hospital District of Helsinki and Uusimaa, Helsinki, Finland                                                                                                                                | olli.carpen@helsinki.fi           | Clinical Groups | Oncology Group                 |
| Johanna Mattson       | Hospital District of Helsinki and Uusimaa, Helsinki, Finland                                                                                                                                | johanna.mattson@hus.fi            | Clinical Groups | Oncology Group                 |
| Eveliina Salminen     | Hospital District of Helsinki and Uusimaa, Helsinki, Finland                                                                                                                                | eveliina.e.salminen@hus.fi        | Clinical Groups | Oncology Group                 |
| Annika Auranen        | Pirkanmaa Hospital District, Tampere, Finland                                                                                                                                               | anaura@utu.fi                     | Clinical Groups | Oncology Group                 |
| Peter Karhitala       | Northern Ostrobothnia Hospital District, Oulu, Finland                                                                                                                                      | peeter.karhitala@oulu.fi          | Clinical Groups | Oncology Group                 |
| Päivi Auvinen         | Northern Savo Hospital District, Kuopio, Finland                                                                                                                                            | paivi.auvinen@kuh.fi              | Clinical Groups | Oncology Group                 |
| Klaus Elenius         | Hospital District of Southwest Finland, Turku, Finland                                                                                                                                      | klaus.elenius@utu.fi              | Clinical Groups | Oncology Group                 |
| Johanna Schleutker    | Hospital District of Southwest Finland, Turku, Finland                                                                                                                                      | johanna.schleutker@utu.fi         | Clinical Groups | Oncology Group                 |
| Esa Pitkänen          | Institute for Molecular Medicine Finland (FIMM), HiLIFE, University of Helsinki, Helsinki, Finland                                                                                          | esa.pitkanen@helsinki.fi          | Clinical Groups | Oncology Group                 |
| Nina Mars             | Institute for Molecular Medicine Finland (FIMM), HiLIFE, University of Helsinki, Helsinki, Finland                                                                                          | nina.mars@helsinki.fi             | Clinical Groups | Oncology Group                 |
| Mark Daly             | Institute for Molecular Medicine Finland (FIMM), HiLIFE, University of Helsinki, Helsinki, Finland; Broad Institute of MIT and Harvard, Massachusetts General Hospital                      | mark.daly@helsinki.fi             | Clinical Groups | Oncology Group                 |
| Rejla Popovic         | Abbvie, Chicago, IL, United States                                                                                                                                                          | rejla.popovic@abbvie.com          | Clinical Groups | Oncology Group                 |
| Jeffrey Waring        | Abbvie, Chicago, IL, United States                                                                                                                                                          | jeff.waring@abbvie.com            | Clinical Groups | Oncology Group                 |
| Bridget Riley-Gillis  | Abbvie, Chicago, IL, United States                                                                                                                                                          | bridget.rileygillis@abbvie.com    | Clinical Groups | Oncology Group                 |



|                         |                                                                                                                                                                                             |                                 |                 |                                       |
|-------------------------|---------------------------------------------------------------------------------------------------------------------------------------------------------------------------------------------|---------------------------------|-----------------|---------------------------------------|
| Anne Lehtonen           | Abbvie, Chicago, IL, United States                                                                                                                                                          | anne.lehtonen@abbvie.com        | Clinical Groups | Oncology Group                        |
| Jennifer Schutzman      | Genentech, San Francisco, CA, United States                                                                                                                                                 | schutzman.jennifer@gene.com     | Clinical Groups | Oncology Group                        |
| Julie Hunkapiller       | Genentech, San Francisco, CA, United States                                                                                                                                                 | hunkapiller.julie@gene.com      | Clinical Groups | Oncology Group                        |
| Natalie Bowers          | Genentech, San Francisco, CA, United States                                                                                                                                                 | bowersn1@gene.com               | Clinical Groups | Oncology Group                        |
| Rion Pendergrass        | Genentech, San Francisco, CA, United States                                                                                                                                                 | penders2@gene.com               | Clinical Groups | Oncology Group                        |
| Diptee Kulkarni         | GlaxoSmithKline, Brentford, United Kingdom                                                                                                                                                  | diptee.a.kulkarni@gsk.com       | Clinical Groups | Oncology Group                        |
| Kirsi Auro              | GlaxoSmithKline, Espoo, Finland                                                                                                                                                             | kirsi.m.auro@gsk.com            | Clinical Groups | Oncology Group                        |
| Alessandro Porello      | Janssen Research & Development, LLC, Spring House, PA, United States                                                                                                                        | APorello@ITS.JNJ.com            | Clinical Groups | Oncology Group                        |
| Andrey Loboda           | Merck, Kenilworth, NJ, United States                                                                                                                                                        | andrey.loboda@merck.com         | Clinical Groups | Oncology Group                        |
| Heli Lehtonen           | Pfizer, New York, NY, United States                                                                                                                                                         | heli.lehtonen@pfizer.com        | Clinical Groups | Oncology Group                        |
| Stefan McDonough        | Pfizer, New York, NY, United States                                                                                                                                                         | stefan.McDonough@pfizer.com     | Clinical Groups | Oncology Group                        |
| Sauli Vuoti             | Janssen-Cilag Oy, Espoo, Finland                                                                                                                                                            | svuoti@its.jnj.com              | Clinical Groups | Oncology Group                        |
| Kai Kaamiranta          | Northern Savo Hospital District, Kuopio, Finland                                                                                                                                            | kai.kaamiranta@uef.fi           | Clinical Groups | Ophthalmology Group                   |
| Joni A Turunen          | Helsinki University Hospital and University of Helsinki, Helsinki, Finland; Eye Genetics Group, Folkhälsan Research Center, Helsinki, Finland                                               | joni.turunen@helsinki.fi        | Clinical Groups | Ophthalmology Group                   |
| Terhi Ollila            | Hospital District of Helsinki and Uusimaa, Helsinki, Finland                                                                                                                                | terhi.ollila@hus.fi             | Clinical Groups | Ophthalmology Group                   |
| Hannu Uusitalo          | Pirkanmaa Hospital District, Tampere, Finland                                                                                                                                               | hannu.uusitalo@tuni.fi          | Clinical Groups | Ophthalmology Group                   |
| Juha Karjalainen        | Institute for Molecular Medicine Finland (FIMM), HiLIFE, University of Helsinki, Helsinki, Finland                                                                                          | juha.karjalainen@helsinki.fi    | Clinical Groups | Ophthalmology Group                   |
| Esa Pitkanen            | Institute for Molecular Medicine Finland (FIMM), HiLIFE, University of Helsinki, Helsinki, Finland                                                                                          | esa.pitkanen@helsinki.fi        | Clinical Groups | Ophthalmology Group                   |
| Mengzhen Liu            | Abbvie, Chicago, IL, United States                                                                                                                                                          | mengzhen.liu@abbvie.com         | Clinical Groups | Ophthalmology Group                   |
| Heiko Runz              | Biogen, Cambridge, MA, United States                                                                                                                                                        | heiko.runz@biogen.com           | Clinical Groups | Ophthalmology Group                   |
| Stephanie Loomis        | Biogen, Cambridge, MA, United States                                                                                                                                                        | stephanie.loomis@biogen.com     | Clinical Groups | Ophthalmology Group                   |
| Erich Strauss           | Genentech, San Francisco, CA, United States                                                                                                                                                 | strauss.erich@gene.com          | Clinical Groups | Ophthalmology Group                   |
| Natalie Bowers          | Genentech, San Francisco, CA, United States                                                                                                                                                 | bowersn1@gene.com               | Clinical Groups | Ophthalmology Group                   |
| Hao Chen                | Genentech, San Francisco, CA, United States                                                                                                                                                 | haoc@gene.com                   | Clinical Groups | Ophthalmology Group                   |
| Rion Pendergrass        | Genentech, San Francisco, CA, United States                                                                                                                                                 | penders2@gene.com               | Clinical Groups | Ophthalmology Group                   |
| Kaisa Tasanen           | Northern Ostrobothnia Hospital District, Oulu, Finland                                                                                                                                      | kaisa.tasanen-maatta@oulu.fi    | Clinical Groups | Dermatology Group                     |
| Laura Huilaja           | Northern Ostrobothnia Hospital District, Oulu, Finland                                                                                                                                      | laura.huilaja@oulu.fi           | Clinical Groups | Dermatology Group                     |
| Katarina Hannula-Jouppi | Hospital District of Helsinki and Uusimaa, Helsinki, Finland                                                                                                                                | katarina.hannula-jouppi@hus.fi  | Clinical Groups | Dermatology Group                     |
| Teea Salmi              | Pirkanmaa Hospital District, Tampere, Finland                                                                                                                                               | teea.salmi@pshp.fi              | Clinical Groups | Dermatology Group                     |
| Sirkku Peltonen         | Hospital District of Southwest Finland, Turku, Finland                                                                                                                                      | sipello@utu.fi                  | Clinical Groups | Dermatology Group                     |
| Leena Koulu             | Hospital District of Southwest Finland, Turku, Finland                                                                                                                                      | leena.koulu@tyks.fi             | Clinical Groups | Dermatology Group                     |
| Nizar Smaoui            | Abbvie, Chicago, IL, United States                                                                                                                                                          | nizar.smaoui@abbvie.com         | Clinical Groups | Dermatology Group                     |
| Fedik Rahimov           | Abbvie, Chicago, IL, United States                                                                                                                                                          | fedik.rahimov@abbvie.com        | Clinical Groups | Dermatology Group                     |
| Anne Lehtonen           | Abbvie, Chicago, IL, United States                                                                                                                                                          | anne.lehtonen@abbvie.com        | Clinical Groups | Dermatology Group                     |
| David Choy              | Genentech, San Francisco, CA, United States                                                                                                                                                 | choy.david@gene.com             | Clinical Groups | Dermatology Group                     |
| Rion Pendergrass        | Genentech, San Francisco, CA, United States                                                                                                                                                 | penders2@gene.com               | Clinical Groups | Dermatology Group                     |
| Dawn Waterworth         | Janssen Research & Development, LLC, Spring House, PA, United States                                                                                                                        | dwaterwo@its.jnj.com            | Clinical Groups | Dermatology Group                     |
| Kirsi Kalpala           | Pfizer, New York, NY, United States                                                                                                                                                         | kirsi.kalpala@pfizer.com        | Clinical Groups | Dermatology Group                     |
| Ying Wu                 | Pfizer, New York, NY, United States                                                                                                                                                         | ying.wu3@pfizer.com             | Clinical Groups | Dermatology Group                     |
| Pirkko Pussinen         | Hospital District of Helsinki and Uusimaa, Helsinki, Finland                                                                                                                                | pirkko.pussinen@helsinki.fi     | Clinical Groups | Odontology Group                      |
| Aino Salminen           | Hospital District of Helsinki and Uusimaa, Helsinki, Finland                                                                                                                                | aino.m.salminen@helsinki.fi     | Clinical Groups | Odontology Group                      |
| Tuula Salo              | Hospital District of Helsinki and Uusimaa, Helsinki, Finland                                                                                                                                | tuula.salo@helsinki.fi          | Clinical Groups | Odontology Group                      |
| David Rice              | Hospital District of Helsinki and Uusimaa, Helsinki, Finland                                                                                                                                | david.rice@helsinki.fi          | Clinical Groups | Odontology Group                      |
| Pekka Nieminen          | Hospital District of Helsinki and Uusimaa, Helsinki, Finland                                                                                                                                | pekka.nieminen@helsinki.fi      | Clinical Groups | Odontology Group                      |
| Ulla Palotie            | Hospital District of Helsinki and Uusimaa, Helsinki, Finland                                                                                                                                | ulla.palotie@helsinki.fi        | Clinical Groups | Odontology Group                      |
| Maria Siponen           | Northern Savo Hospital District, Kuopio, Finland                                                                                                                                            | maria.siponen@uef.fi            | Clinical Groups | Odontology Group                      |
| Liisa Suominen          | Northern Savo Hospital District, Kuopio, Finland                                                                                                                                            | liisa.suominen@uef.fi           | Clinical Groups | Odontology Group                      |
| Paivi Mäntylä           | Northern Savo Hospital District, Kuopio, Finland                                                                                                                                            | paivi.mantyla@uef.fi            | Clinical Groups | Odontology Group                      |
| Ulvi Gursoy             | Hospital District of Southwest Finland, Turku, Finland                                                                                                                                      | ulvi.gursoy@utu.fi              | Clinical Groups | Odontology Group                      |
| Vuokko Anttonen         | Northern Ostrobothnia Hospital District, Oulu, Finland                                                                                                                                      | vuokko.anttonen@oulu.fi         | Clinical Groups | Odontology Group                      |
| Kirsi Sipilä            | Research Unit of Oral Health Sciences Faculty of Medicine, University of Oulu, Oulu, Finland; Medical Research Center, Oulu, Oulu University Hospital and University of Oulu, Oulu, Finland | kirsi.sipila@oulu.fi            | Clinical Groups | Odontology Group                      |
| Rion Pendergrass        | Genentech, San Francisco, CA, United States                                                                                                                                                 | pendergass.sarah@gene.com       | Clinical Groups | Odontology Group                      |
| Hannele Laivuori        | Institute for Molecular Medicine Finland (FIMM), HiLIFE, University of Helsinki, Helsinki, Finland                                                                                          | hannele.laivuori@helsinki.fi    | Clinical Groups | Women's Health and Reproduction Group |
| Venla Kurra             | Pirkanmaa Hospital District, Tampere, Finland                                                                                                                                               | venla.kurra@tuni.fi             | Clinical Groups | Women's Health and Reproduction Group |
| Laura Kotaniemi-Talonen | Pirkanmaa Hospital District, Tampere, Finland                                                                                                                                               | laura.kotaniemi-talonen@tuni.fi | Clinical Groups | Women's Health and Reproduction Group |
| Oskari Heikinheimo      | Hospital District of Helsinki and Uusimaa, Helsinki, Finland                                                                                                                                | oskari.heikinheimo@helsinki.fi  | Clinical Groups | Women's Health and Reproduction Group |
| Ilkka Kalliala          | Hospital District of Helsinki and Uusimaa, Helsinki, Finland                                                                                                                                | ilkka.kalliala@hus.fi           | Clinical Groups | Women's Health and Reproduction Group |
| Lauri Aaltonen          | Hospital District of Helsinki and Uusimaa, Helsinki, Finland                                                                                                                                | lauri.aaltonen@helsinki.fi      | Clinical Groups | Women's Health and Reproduction Group |
| Varpu Jokimaa           | Hospital District of Southwest Finland, Turku, Finland                                                                                                                                      | varpu.jokimaa@utu.fi            | Clinical Groups | Women's Health and Reproduction Group |
| Johannes Kettunen       | Northern Ostrobothnia Hospital District, Oulu, Finland                                                                                                                                      | Johannes.Kettunen@oulu.fi       | Clinical Groups | Women's Health and Reproduction Group |

|                            |                                                                                                                                                                                                           |                                    |                                |                                       |
|----------------------------|-----------------------------------------------------------------------------------------------------------------------------------------------------------------------------------------------------------|------------------------------------|--------------------------------|---------------------------------------|
| Marja Väärasmäki           | Northern Ostrobothnia Hospital District, Oulu, Finland                                                                                                                                                    | marja.vaarasmaki@oulu.fi           | Clinical Groups                | Women's Health and Reproduction Group |
| Outi Uimari                | Northern Ostrobothnia Hospital District, Oulu, Finland                                                                                                                                                    | outi.uimari@oulu.fi                | Clinical Groups                | Women's Health and Reproduction Group |
| Laure Morin-Papunen        | Northern Ostrobothnia Hospital District, Oulu, Finland                                                                                                                                                    | lmp@cc.oulu.fi                     | Clinical Groups                | Women's Health and Reproduction Group |
| Maarit Ninimäki            | Northern Ostrobothnia Hospital District, Oulu, Finland                                                                                                                                                    | maarit.ninimaki@oulu.fi            | Clinical Groups                | Women's Health and Reproduction Group |
| Terhi Pilttonen            | Northern Ostrobothnia Hospital District, Oulu, Finland                                                                                                                                                    | terhi.pilttonen@oulu.fi            | Clinical Groups                | Women's Health and Reproduction Group |
| Katja Kivinen              | Institute for Molecular Medicine Finland (FIMM), HiLIFE, University of Helsinki, Helsinki, Finland                                                                                                        | katja.kivinen@helsinki.fi          | Clinical Groups                | Women's Health and Reproduction Group |
| Elisabeth Widen            | Institute for Molecular Medicine Finland (FIMM), HiLIFE, University of Helsinki, Helsinki, Finland                                                                                                        | elisabeth.widen@helsinki.fi        | Clinical Groups                | Women's Health and Reproduction Group |
| Taru Tukiainen             | Institute for Molecular Medicine Finland (FIMM), HiLIFE, University of Helsinki, Helsinki, Finland                                                                                                        | taru.tukiainen@helsinki.fi         | Clinical Groups                | Women's Health and Reproduction Group |
| Mary Pat Reeve             | Institute for Molecular Medicine Finland (FIMM), HiLIFE, University of Helsinki, Helsinki, Finland                                                                                                        | mary.reeve@helsinki.fi             | Clinical Groups                | Women's Health and Reproduction Group |
| Mark Daly                  | Institute for Molecular Medicine Finland (FIMM), HiLIFE, University of Helsinki, Helsinki, Finland; Broad Institute of MIT and Harvard, Massachusetts General Hospital                                    | mark.daly@helsinki.fi              | Clinical Groups                | Women's Health and Reproduction Group |
| Niko Välimäki              | University of Helsinki, Helsinki, Finland                                                                                                                                                                 | niko.valimaki@helsinki.fi          | Clinical Groups                | Women's Health and Reproduction Group |
| Eija Laakkonen             | University of Jyväskylä, Jyväskylä, Finland                                                                                                                                                               | eija.k.laakkonen@juu.fi            | Clinical Groups                | Women's Health and Reproduction Group |
| Jaakko Tyrmi               | University of Oulu, Oulu, Finland / University of Tampere, Tampere, Finland                                                                                                                               | jaakko.tyrmi@oulu.fi               | Clinical Groups                | Women's Health and Reproduction Group |
| Heidi Silven               | University of Oulu, Oulu, Finland                                                                                                                                                                         | heidi.silven@student.oulu.fi       | Clinical Groups                | Women's Health and Reproduction Group |
| Eeva Sliz                  | University of Oulu, Oulu, Finland                                                                                                                                                                         | eeva.sliz@oulu.fi                  | Clinical Groups                | Women's Health and Reproduction Group |
| Riikka Arffman             | University of Oulu, Oulu, Finland                                                                                                                                                                         | riikka.arffman@oulu.fi             | Clinical Groups                | Women's Health and Reproduction Group |
| Susanna Savukoski          | University of Oulu, Oulu, Finland                                                                                                                                                                         | susanna.savukoski@oulu.fi          | Clinical Groups                | Women's Health and Reproduction Group |
| Triin Laisk                | Estonian biobank, Tartu, Estonia                                                                                                                                                                          | triin.laisk@ut.ee                  | Clinical Groups                | Women's Health and Reproduction Group |
| Natalia Pujol              | Estonian biobank, Tartu, Estonia                                                                                                                                                                          | natalia.pujolgualdo@oulu.fi        | Clinical Groups                | Women's Health and Reproduction Group |
| Mengzhen Liu               | Abbvie, Chicago, IL, United States                                                                                                                                                                        | mengzhen.liu@abbvie.com            | Clinical Groups                | Women's Health and Reproduction Group |
| Bridget Riley-Gillis       | Abbvie, Chicago, IL, United States                                                                                                                                                                        | bridget.rileygillis@abbvie.com     | Clinical Groups                | Women's Health and Reproduction Group |
| Rion Pendergrass           | Genentech, San Francisco, CA, United States                                                                                                                                                               | penders2@gene.com                  | Clinical Groups                | Women's Health and Reproduction Group |
| Janet Kumar                | GlaxoSmithKline, Collegeville, PA, United States                                                                                                                                                          | janet.x.kumar@gsk.com              | Clinical Groups                | Women's Health and Reproduction Group |
| Kirsi Auro                 | GlaxoSmithKline, Espoo, Finland                                                                                                                                                                           | kirsi.m.auro@gsk.com               | Clinical Groups                | Women's Health and Reproduction Group |
| Iiris Hovatta              | University of Helsinki, Finland                                                                                                                                                                           | iiris.hovatta@helsinki.fi          | Clinical Groups                | Depression group                      |
| Chia-Yen Chen              | Biogen, Cambridge, MA, United States                                                                                                                                                                      | chiayen.chen@biogen.com            | Clinical Groups                | Depression group                      |
| Erkki Isometsä             | Hospital District of Helsinki and Uusimaa, Helsinki, Finland                                                                                                                                              | erkki.isometsa@hus.fi              | Clinical Groups                | Depression group                      |
| Hanna Ollila               | Institute for Molecular Medicine Finland (FIMM), HiLIFE, University of Helsinki, Helsinki, Finland                                                                                                        | hanna.m.ollila@helsinki.fi         | Clinical Groups                | Depression group                      |
| Jaana Suvisaari            | Finnish Institute for Health and Welfare (THL), Helsinki, Finland                                                                                                                                         | jaana.suvisaari@thl.fi             | Clinical Groups                | Depression group                      |
| Thomas Damm Als            | Aarhus University, Denmark                                                                                                                                                                                | tda@biomed.au.dk                   | Clinical Groups                | Depression group                      |
| Antti Mäkitie              | Department of Otorhinolaryngology - Head and Neck Surgery, University of Helsinki and Helsinki University Hospital, Helsinki, Finland                                                                     | antti.makitie@helsinki.fi          | Clinical Groups                | ENT (ear, nose and throat) Group      |
| Argyro Bizaki-Vallaskangas | Pirkanmaa Hospital District, Tampere, Finland                                                                                                                                                             | argyro.bizaki-vallaskangas@tuni.fi | Clinical Groups                | ENT (ear, nose and throat) Group      |
| Sanna Toppila-Salmi        | University of Helsinki, Finland                                                                                                                                                                           | sanna.salmi@helsinki.fi            | Clinical Groups                | ENT (ear, nose and throat) Group      |
| Tytti Willberg             | Hospital District of Southwest Finland, Turku, Finland                                                                                                                                                    | tytti.willberg@tyks.fi             | Clinical Groups                | ENT (ear, nose and throat) Group      |
| Elmo Saarentaus            | Institute for Molecular Medicine Finland (FIMM), HiLIFE, University of Helsinki, Helsinki, Finland                                                                                                        | elmo.saarentaus@helsinki.fi        | Clinical Groups                | ENT (ear, nose and throat) Group      |
| Antti Aarnisalo            | Hospital District of Helsinki and Uusimaa, Helsinki, Finland                                                                                                                                              | antti.aarnisalo@hus.fi             | Clinical Groups                | ENT (ear, nose and throat) Group      |
| Eveliina Salminen          | Hospital District of Helsinki and Uusimaa, Helsinki, Finland                                                                                                                                              | eveliina.e.salminen@hus.fi         | Clinical Groups                | ENT (ear, nose and throat) Group      |
| Elisa Rahikkala            | Northern Ostrobothnia Hospital District, Oulu, Finland                                                                                                                                                    | elisa.rahikkala@ppshp.fi           | Clinical Groups                | ENT (ear, nose and throat) Group      |
| Johannes Kettunen          | Northern Ostrobothnia Hospital District, Oulu, Finland                                                                                                                                                    | johannes.kettunen@oulu.fi          | Clinical Groups                | ENT (ear, nose and throat) Group      |
| Kristiina Aittomäki        | Department of Medical Genetics, Helsinki University Central Hospital, Helsinki, Finland<br>Transplantation and Liver Surgery Clinic, Helsinki University Hospital, Helsinki University, Helsinki, Finland | kristiina.aittomaki@helsinki.fi    | Clinical Groups                | POI (premature ovarian failure) Group |
| Fredrik Åberg              | Institute for Molecular Medicine Finland (FIMM), HiLIFE, University of Helsinki, Helsinki, Finland; Broad Institute, Cambridge, MA, United States                                                         | fredrik.berg@helsinki.fi           | Clinical Groups                | LiverScore Group                      |
| Mitja Kurki                | Institute for Molecular Medicine Finland (FIMM), HiLIFE, University of Helsinki, Helsinki, Finland; Broad Institute, Cambridge, MA, United States                                                         | mkurki@broadinstitute.org          | FinnGen Analysis working group | FinnGen Analysis working group        |
| Samuli Ripatti             | Institute for Molecular Medicine Finland (FIMM), HiLIFE, University of Helsinki, Helsinki, Finland                                                                                                        | samuli.ripatti@helsinki.fi         | FinnGen Analysis working group | FinnGen Analysis working group        |
| Mark Daly                  | Institute for Molecular Medicine Finland (FIMM), HiLIFE, University of Helsinki, Helsinki, Finland; Broad Institute of MIT and Harvard, Massachusetts General Hospital                                    | mark.daly@helsinki.fi              | FinnGen Analysis working group | FinnGen Analysis working group        |

|                             |                                                                                                                                                                                             |                                       |                                |                                |
|-----------------------------|---------------------------------------------------------------------------------------------------------------------------------------------------------------------------------------------|---------------------------------------|--------------------------------|--------------------------------|
| Juha Karjalainen            | Institute for Molecular Medicine Finland (FIMM), HiLIFE, University of Helsinki, Helsinki, Finland                                                                                          | juha.karjalainen@helsinki.fi          | FinnGen Analysis working group | FinnGen Analysis working group |
| Aki Havulinna               | Institute for Molecular Medicine Finland (FIMM), HiLIFE, University of Helsinki, Helsinki, Finland; Finnish Institute for Health and Welfare (THL), Helsinki, Finland                       | aki.havulinna@helsinki.fi             | FinnGen Analysis working group | FinnGen Analysis working group |
| Juha Mehtonen               | Institute for Molecular Medicine Finland (FIMM), HiLIFE, University of Helsinki, Helsinki, Finland                                                                                          | juha.mehtonen@helsinki.fi             | FinnGen Analysis working group | FinnGen Analysis working group |
| Priit Palta                 | Institute for Molecular Medicine Finland (FIMM), HiLIFE, University of Helsinki, Helsinki, Finland                                                                                          | priit.palta@helsinki.fi               | FinnGen Analysis working group | FinnGen Analysis working group |
| Shabbeer Hassan             | Institute for Molecular Medicine Finland (FIMM), HiLIFE, University of Helsinki, Helsinki, Finland                                                                                          | shabbeer.hassan@helsinki.fi           | FinnGen Analysis working group | FinnGen Analysis working group |
| Pietro Della Briotta Parolo | Institute for Molecular Medicine Finland (FIMM), HiLIFE, University of Helsinki, Helsinki, Finland                                                                                          | pietro.dellabriottaparolo@helsinki.fi | FinnGen Analysis working group | FinnGen Analysis working group |
| Wei Zhou                    | Broad Institute, Cambridge, MA, United States                                                                                                                                               | wzhou@broadinstitute.org              | FinnGen Analysis working group | FinnGen Analysis working group |
| Mutaamba Maasha             | Broad Institute, Cambridge, MA, United States                                                                                                                                               | mmaasha@broadinstitute.org            | FinnGen Analysis working group | FinnGen Analysis working group |
| Shabbeer Hassan             | Institute for Molecular Medicine Finland (FIMM), HiLIFE, University of Helsinki, Helsinki, Finland                                                                                          | shabbeer.hassan@helsinki.fi           | FinnGen Analysis working group | FinnGen Analysis working group |
| Susanna Lemmela             | Institute for Molecular Medicine Finland (FIMM), HiLIFE, University of Helsinki, Helsinki, Finland                                                                                          | susanna.lemmela@helsinki.fi           | FinnGen Analysis working group | FinnGen Analysis working group |
| Manuel Rivas                | University of Stanford, Stanford, CA, United States                                                                                                                                         | mrivas@stanford.edu                   | FinnGen Analysis working group | FinnGen Analysis working group |
| Mari E. Niemi               | Institute for Molecular Medicine Finland (FIMM), HiLIFE, University of Helsinki, Helsinki, Finland                                                                                          | mari.e.niemi@helsinki.fi              | FinnGen Analysis working group | FinnGen Analysis working group |
| Aarno Palotie               | Institute for Molecular Medicine Finland (FIMM), HiLIFE, University of Helsinki, Helsinki, Finland                                                                                          | aarno.palotie@helsinki.fi             | FinnGen Analysis working group | FinnGen Analysis working group |
| Aoxing Liu                  | Institute for Molecular Medicine Finland (FIMM), HiLIFE, University of Helsinki, Helsinki, Finland                                                                                          | aoxing.liu@helsinki.fi                | FinnGen Analysis working group | FinnGen Analysis working group |
| Arto Lehisto                | Institute for Molecular Medicine Finland (FIMM), HiLIFE, University of Helsinki, Helsinki, Finland                                                                                          | arto.lehisto@helsinki.fi              | FinnGen Analysis working group | FinnGen Analysis working group |
| Andrea Ganna                | Institute for Molecular Medicine Finland (FIMM), HiLIFE, University of Helsinki, Helsinki, Finland                                                                                          | aganna@broadinstitute.org             | FinnGen Analysis working group | FinnGen Analysis working group |
| Vincent Llorens             | Institute for Molecular Medicine Finland (FIMM), HiLIFE, University of Helsinki, Helsinki, Finland                                                                                          | vincent.llorens@helsinki.fi           | FinnGen Analysis working group | FinnGen Analysis working group |
| Hannele Laivuori            | Institute for Molecular Medicine Finland (FIMM), HiLIFE, University of Helsinki, Helsinki, Finland                                                                                          | hannele.laivuori@helsinki.fi          | FinnGen Analysis working group | FinnGen Analysis working group |
| Taru Tukiainen              | Institute for Molecular Medicine Finland (FIMM), HiLIFE, University of Helsinki, Helsinki, Finland                                                                                          | taru.tukiainen@helsinki.fi            | FinnGen Analysis working group | FinnGen Analysis working group |
| Mary Pat Reeve              | Institute for Molecular Medicine Finland (FIMM), HiLIFE, University of Helsinki, Helsinki, Finland                                                                                          | mary.reeve@helsinki.fi                | FinnGen Analysis working group | FinnGen Analysis working group |
| Henrike Heyne               | Institute for Molecular Medicine Finland (FIMM), HiLIFE, University of Helsinki, Helsinki, Finland                                                                                          | hheyne@broadinstitute.org             | FinnGen Analysis working group | FinnGen Analysis working group |
| Nina Mars                   | Institute for Molecular Medicine Finland (FIMM), HiLIFE, University of Helsinki, Helsinki, Finland                                                                                          | nina.mars@helsinki.fi                 | FinnGen Analysis working group | FinnGen Analysis working group |
| Joel Rámó                   | Institute for Molecular Medicine Finland (FIMM), HiLIFE, University of Helsinki, Helsinki, Finland                                                                                          | joel.ramo@helsinki.fi                 | FinnGen Analysis working group | FinnGen Analysis working group |
| Elmo Saarentaus             | Institute for Molecular Medicine Finland (FIMM), HiLIFE, University of Helsinki, Helsinki, Finland                                                                                          | elmo.saarentaus@helsinki.fi           | FinnGen Analysis working group | FinnGen Analysis working group |
| Hanna Ollila                | Institute for Molecular Medicine Finland (FIMM), HiLIFE, University of Helsinki, Helsinki, Finland                                                                                          | hanna.m.ollila@helsinki.fi            | FinnGen Analysis working group | FinnGen Analysis working group |
| Rodos Rodosthenous          | Institute for Molecular Medicine Finland (FIMM), HiLIFE, University of Helsinki, Helsinki, Finland                                                                                          | rodos.rodosthenous@helsinki.fi        | FinnGen Analysis working group | FinnGen Analysis working group |
| Satu Strausz                | Institute for Molecular Medicine Finland (FIMM), HiLIFE, University of Helsinki, Helsinki, Finland                                                                                          | satu.strausz@helsinki.fi              | FinnGen Analysis working group | FinnGen Analysis working group |
| Tuula Palotie               | University of Helsinki and Hospital District of Helsinki and Uusimaa, Helsinki, Finland                                                                                                     | tuula.palotie@helsinki.fi             | FinnGen Analysis working group | FinnGen Analysis working group |
| Kimmo Palin                 | University of Helsinki, Helsinki, Finland                                                                                                                                                   | kimmo.palin@helsinki.fi               | FinnGen Analysis working group | FinnGen Analysis working group |
| Javier Garcia-Tabuenca      | University of Tampere, Tampere, Finland                                                                                                                                                     | javier.graciatabuenca@tuni.fi         | FinnGen Analysis working group | FinnGen Analysis working group |
| Harri Siirtola              | University of Tampere, Tampere, Finland                                                                                                                                                     | harri.siirtola@tuni.fi                | FinnGen Analysis working group | FinnGen Analysis working group |
| Tuomo Kiiskinen             | Institute for Molecular Medicine Finland (FIMM), HiLIFE, University of Helsinki, Helsinki, Finland                                                                                          | tuomo.kiiskinen@helsinki.fi           | FinnGen Analysis working group | FinnGen Analysis working group |
| Jiwoo Lee                   | Institute for Molecular Medicine Finland (FIMM), HiLIFE, University of Helsinki, Helsinki, Finland; Broad Institute, Cambridge, MA, United States                                           | jiwoo.lee@helsinki.fi                 | FinnGen Analysis working group | FinnGen Analysis working group |
| Kristin Tsuo                | Institute for Molecular Medicine Finland (FIMM), HiLIFE, University of Helsinki, Helsinki, Finland; Broad Institute, Cambridge, MA, United States                                           | kristintsuo@fas.harvard.edu           | FinnGen Analysis working group | FinnGen Analysis working group |
| Amanda Elliott              | Institute for Molecular Medicine Finland (FIMM), HiLIFE, University of Helsinki, Helsinki, Finland; Broad Institute, Cambridge, MA, USA and Massachusetts General Hospital, Boston, MA, USA | aelliott@broadinstitute.org           | FinnGen Analysis working group | FinnGen Analysis working group |
| Kati Kristiansson           | THL Biobank / Finnish Institute for Health and Welfare (THL), Helsinki, Finland                                                                                                             | kati.kristiansson@thl.fi              | FinnGen Analysis working group | FinnGen Analysis working group |
| Mikko Arvas                 | Finnish Red Cross Blood Service / Finnish Hematology Registry and Clinical Biobank, Helsinki, Finland                                                                                       | mikko.arvas@veripalvelu.fi            | FinnGen Analysis working group | FinnGen Analysis working group |
| Kati Hyvärinen              | Finnish Red Cross Blood Service, Helsinki, Finland                                                                                                                                          | kati.hyvarinen@veripalvelu.fi         | FinnGen Analysis working group | FinnGen Analysis working group |
| Jarmo Ritari                | Finnish Red Cross Blood Service, Helsinki, Finland                                                                                                                                          | jarmo.ritari@veripalvelu.fi           | FinnGen Analysis working group | FinnGen Analysis working group |
| Olli Carpen                 | Helsinki Biobank / Helsinki University and Hospital District of Helsinki and Uusimaa, Helsinki                                                                                              | olli.carpen@helsinki.fi               | FinnGen Analysis working group | FinnGen Analysis working group |
| Johannes Kettunen           | Northern Finland Biobank Borealis / University of Oulu / Northern Ostrobothnia Hospital District, Oulu, Finland                                                                             | johannes.kettunen@oulu.fi             | FinnGen Analysis working group | FinnGen Analysis working group |
| Katri Pylkäs                | University of Oulu, Oulu, Finland                                                                                                                                                           | katri.pylkas@oulu.fi                  | FinnGen Analysis working group | FinnGen Analysis working group |
| Eeva Sliz                   | University of Oulu, Oulu, Finland                                                                                                                                                           | eeva.sliz@oulu.fi                     | FinnGen Analysis working group | FinnGen Analysis working group |
| Minna Karjalainen           | University of Oulu, Oulu, Finland                                                                                                                                                           | minna.k.karjalainen@oulu.fi           | FinnGen Analysis working group | FinnGen Analysis working group |
| Tuomo Mantere               | Northern Finland Biobank Borealis / University of Oulu / Northern Ostrobothnia Hospital District, Oulu, Finland                                                                             | tuomo.mantere@oulu.fi                 | FinnGen Analysis working group | FinnGen Analysis working group |
| Eeva Kangasniemi            | Finnish Clinical Biobank Tampere / University of Tampere / Pirkanmaa Hospital District, Tampere, Finland                                                                                    | eeva.kangasniemi@pshp.fi              | FinnGen Analysis working group | FinnGen Analysis working group |
| Sami Heikkinen              | University of Eastern Finland, Kuopio, Finland                                                                                                                                              | sami.heikkinen@uef.fi                 | FinnGen Analysis working group | FinnGen Analysis working group |
| Arto Mannermaa              | Biobank of Eastern Finland / University of Eastern Finland / Northern Savo Hospital District, Kuopio, Finland                                                                               | arto.mannermaa@uef.fi                 | FinnGen Analysis working group | FinnGen Analysis working group |
| Eija Laakkonen              | University of Jyväskylä, Jyväskylä, Finland                                                                                                                                                 | eija.k.laakkonen@ju.fi                | FinnGen Analysis working group | FinnGen Analysis working group |
| Nina Pitkanen               | Auria Biobank / University of Turku / Hospital District of Southwest Finland, Turku, Finland                                                                                                | Niina.Pitkanen@tyks.fi                | FinnGen Analysis working group | FinnGen Analysis working group |
| Samuel Lessard              | Translational Sciences, Sanofi R&D, Framingham, MA, USA                                                                                                                                     | samuel.lessard@sanofi.com             | FinnGen Analysis working group | FinnGen Analysis working group |
| Clément Chatelain           | Translational Sciences, Sanofi R&D, Framingham, MA, USA                                                                                                                                     | clement.chatelain@sanofi.com          | FinnGen Analysis working group | FinnGen Analysis working group |
| Perttu Terho                | Auria Biobank / University of Turku / Hospital District of Southwest Finland, Turku, Finland                                                                                                | perttu.terho@tyks.fi                  | Biobank directors              | Biobank directors              |
| Sirpa Soini                 | THL Biobank / Finnish Institute for Health and Welfare (THL), Helsinki, Finland                                                                                                             | sirpa.soini@thl.fi                    | Biobank directors              | Biobank directors              |

|                                |                                                                                                                                                                       |                                       |                   |                                |
|--------------------------------|-----------------------------------------------------------------------------------------------------------------------------------------------------------------------|---------------------------------------|-------------------|--------------------------------|
| Jukka Partanen                 | Finnish Red Cross Blood Service / Finnish Hematology Registry and Clinical Biobank, Helsinki, Finland                                                                 | jukka.partanen@veripalvelu.fi         | Biobank directors | Biobank directors              |
| Eero Punkka                    | Helsinki Biobank / Helsinki University and Hospital District of Helsinki and Uusimaa, Helsinki                                                                        | eero.punkka@hus.fi                    | Biobank directors | Biobank directors              |
| Raisa Serpi                    | Northern Finland Biobank Borealis / University of Oulu / Northern Ostrobothnia Hospital District, Oulu, Finland                                                       | raisa.serpi@ppshp.fi                  | Biobank directors | Biobank directors              |
| Sanna Siltanen                 | Finnish Clinical Biobank Tampere / University of Tampere / Pirkanmaa Hospital District, Tampere, Finland                                                              | sanna.siltanen@pshp.fi                | Biobank directors | Biobank directors              |
| Veli-Matti Kosma               | Biobank of Eastern Finland / University of Eastern Finland / Northern Savo Hospital District, Kuopio, Finland                                                         | veli-matti.kosma@uef.fi               | Biobank directors | Biobank directors              |
| Teijo Kuopio                   | Central Finland Biobank / University of Jyväskylä / Central Finland Health Care District, Jyväskylä, Finland                                                          | teijo.kuopio@ksshp.fi                 | Biobank directors | Biobank directors              |
| Anu Jalanko                    | Institute for Molecular Medicine Finland (FIMM), HiLIFE, University of Helsinki, Helsinki, Finland                                                                    | anu.jalanko@helsinki.fi               | FinnGen Teams     | Administration                 |
| Huei-Yi Shen                   | Institute for Molecular Medicine Finland (FIMM), HiLIFE, University of Helsinki, Helsinki, Finland                                                                    | huei-yi.shen@helsinki.fi              | FinnGen Teams     | Administration                 |
| Risto Kajanne                  | Institute for Molecular Medicine Finland (FIMM), HiLIFE, University of Helsinki, Helsinki, Finland                                                                    | risto.kajanne@helsinki.fi             | FinnGen Teams     | Administration                 |
| Mervi Aavikko                  | Institute for Molecular Medicine Finland (FIMM), HiLIFE, University of Helsinki, Helsinki, Finland                                                                    | mervi.aavikko@helsinki.fi             | FinnGen Teams     | Administration                 |
| Henna Palin                    | Finnish Clinical Biobank Tampere / University of Tampere / Pirkanmaa Hospital District, Tampere, Finland                                                              | henna.palin@pshp.fi                   | FinnGen Teams     | Administration                 |
| Malla-Maria Linna              | Helsinki Biobank / Helsinki University and Hospital District of Helsinki and Uusimaa, Helsinki                                                                        | malla-maria.linna@hus.fi              | FinnGen Teams     | Administration                 |
| Mitja Kurki                    | Institute for Molecular Medicine Finland (FIMM), HiLIFE, University of Helsinki, Helsinki, Finland; Broad Institute, Cambridge, MA, United States                     | mkurki@broadinstitute.org             | FinnGen Teams     | Analysis                       |
| Juha Karjalainen               | Institute for Molecular Medicine Finland (FIMM), HiLIFE, University of Helsinki, Helsinki, Finland                                                                    | juha.karjalainen@helsinki.fi          | FinnGen Teams     | Analysis                       |
| Pietro Della Briotta Parolo    | Institute for Molecular Medicine Finland (FIMM), HiLIFE, University of Helsinki, Helsinki, Finland                                                                    | pietro.dellabriottaparolo@helsinki.fi | FinnGen Teams     | Analysis                       |
| Arto Lehisto                   | Institute for Molecular Medicine Finland (FIMM), HiLIFE, University of Helsinki, Helsinki, Finland                                                                    | arto.lehisto@helsinki.fi              | FinnGen Teams     | Analysis                       |
| Juha Mehtonen                  | Institute for Molecular Medicine Finland (FIMM), HiLIFE, University of Helsinki, Helsinki, Finland                                                                    | juha.mehtonen@helsinki.fi             | FinnGen Teams     | Analysis                       |
| Wei Zhou                       | Broad Institute, Cambridge, MA, United States                                                                                                                         | wzhou@broadinstitute.org              | FinnGen Teams     | Analysis                       |
| Masahiro Kanai                 | Broad Institute, Cambridge, MA, United States                                                                                                                         | mkanai@broadinstitute.org             | FinnGen Teams     | Analysis                       |
| Mutaamba Maasha                | Broad Institute, Cambridge, MA, United States                                                                                                                         | mmaasha@broadinstitute.org            | FinnGen Teams     | Analysis                       |
| Hannele Laivuori               | Institute for Molecular Medicine Finland (FIMM), HiLIFE, University of Helsinki, Helsinki, Finland                                                                    | hannele.laivuori@helsinki.fi          | FinnGen Teams     | Clinical Endpoint Development  |
| Aki Havulinna                  | Institute for Molecular Medicine Finland (FIMM), HiLIFE, University of Helsinki, Helsinki, Finland; Finnish Institute for Health and Welfare (THL), Helsinki, Finland | aki.havulinna@helsinki.fi             | FinnGen Teams     | Clinical Endpoint Development  |
| Susanna Lemmelä                | Institute for Molecular Medicine Finland (FIMM), HiLIFE, University of Helsinki, Helsinki, Finland                                                                    | susanna.lemmela@helsinki.fi           | FinnGen Teams     | Clinical Endpoint Development  |
| Tuomo Kiiskinen                | Institute for Molecular Medicine Finland (FIMM), HiLIFE, University of Helsinki, Helsinki, Finland                                                                    | tuomo.kiiskinen@helsinki.fi           | FinnGen Teams     | Clinical Endpoint Development  |
| L. Elisa Lahtela               | Institute for Molecular Medicine Finland (FIMM), HiLIFE, University of Helsinki, Helsinki, Finland                                                                    | laura.lahtela@helsinki.fi             | FinnGen Teams     | Clinical Endpoint Development  |
| Mari Kaunisto                  | Institute for Molecular Medicine Finland (FIMM), HiLIFE, University of Helsinki, Helsinki, Finland                                                                    | mari.kaunisto@helsinki.fi             | FinnGen Teams     | Communication                  |
| Elina Kilpeläinen              | Institute for Molecular Medicine Finland (FIMM), HiLIFE, University of Helsinki, Helsinki, Finland                                                                    | elina.kilpelainen@helsinki.fi         | FinnGen Teams     | E-Science                      |
| Timo P. Sipilä                 | Institute for Molecular Medicine Finland (FIMM), HiLIFE, University of Helsinki, Helsinki, Finland                                                                    | timo.p.sipila@helsinki.fi             | FinnGen Teams     | E-Science                      |
| Oluwaseun Alexander Dada       | Institute for Molecular Medicine Finland (FIMM), HiLIFE, University of Helsinki, Helsinki, Finland                                                                    | alexander.dada@helsinki.fi            | FinnGen Teams     | E-Science                      |
| Awaisa Ghazal                  | Institute for Molecular Medicine Finland (FIMM), HiLIFE, University of Helsinki, Helsinki, Finland                                                                    | awaisa.ghazal@helsinki.fi             | FinnGen Teams     | E-Science                      |
| Anastasia Kytölä               | Institute for Molecular Medicine Finland (FIMM), HiLIFE, University of Helsinki, Helsinki, Finland                                                                    | anastasia.shcherban@helsinki.fi       | FinnGen Teams     | E-Science                      |
| Rigbe Weldatsadik              | Institute for Molecular Medicine Finland (FIMM), HiLIFE, University of Helsinki, Helsinki, Finland                                                                    | rigbe.weldatsadik@helsinki.fi         | FinnGen Teams     | E-Science                      |
| Sanni Ruotsalainen             | Institute for Molecular Medicine Finland (FIMM), HiLIFE, University of Helsinki, Helsinki, Finland                                                                    | sanni.ruotsalainen@helsinki.fi        | FinnGen Teams     | E-Science                      |
| Kati Donner                    | Institute for Molecular Medicine Finland (FIMM), HiLIFE, University of Helsinki, Helsinki, Finland                                                                    | kati.donner@helsinki.fi               | FinnGen Teams     | Genotyping                     |
| Timo P. Sipilä                 | Institute for Molecular Medicine Finland (FIMM), HiLIFE, University of Helsinki, Helsinki, Finland                                                                    | timo.p.sipila@helsinki.fi             | FinnGen Teams     | Genotyping                     |
| Anu Loukola                    | Helsinki Biobank / Helsinki University and Hospital District of Helsinki and Uusimaa, Helsinki                                                                        | anu.loukola@hus.fi                    | FinnGen Teams     | Sample Collection Coordination |
| Päivi Laiho                    | THL Biobank / Finnish Institute for Health and Welfare (THL), Helsinki, Finland                                                                                       | paivi.laiho@thl.fi                    | FinnGen Teams     | Sample Logistics               |
| Tuuli Sistonen                 | THL Biobank / Finnish Institute for Health and Welfare (THL), Helsinki, Finland                                                                                       | tuuli.sistonen@thl.fi                 | FinnGen Teams     | Sample Logistics               |
| Essi Kaiharju                  | THL Biobank / Finnish Institute for Health and Welfare (THL), Helsinki, Finland                                                                                       | essi.kaiharju@thl.fi                  | FinnGen Teams     | Sample Logistics               |
| Markku Laukkanen               | THL Biobank / Finnish Institute for Health and Welfare (THL), Helsinki, Finland                                                                                       | markku.laukkanen@thl.fi               | FinnGen Teams     | Sample Logistics               |
| Elina Järvensivu               | THL Biobank / Finnish Institute for Health and Welfare (THL), Helsinki, Finland                                                                                       | elina.jarvensivu@thl.fi               | FinnGen Teams     | Sample Logistics               |
| Sini Lähteenmäki               | THL Biobank / Finnish Institute for Health and Welfare (THL), Helsinki, Finland                                                                                       | sini.lahteenmaki@thl.fi               | FinnGen Teams     | Sample Logistics               |
| Lotta Männikkö                 | THL Biobank / Finnish Institute for Health and Welfare (THL), Helsinki, Finland                                                                                       | lotta.mannikko@thl.fi                 | FinnGen Teams     | Sample Logistics               |
| Regis Wong                     | THL Biobank / Finnish Institute for Health and Welfare (THL), Helsinki, Finland                                                                                       | regis.wong@thl.fi                     | FinnGen Teams     | Sample Logistics               |
| Auli Toivola                   | THL Biobank / Finnish Institute for Health and Welfare (THL), Helsinki, Finland                                                                                       | auli.toivola@thl.fi                   | FinnGen Teams     | Sample Logistics               |
| Minna Brunfeldt                | THL Biobank / Finnish Institute for Health and Welfare (THL), Helsinki, Finland                                                                                       | minna.brunfeldt@thl.fi                | FinnGen Teams     | Registry Data Operations       |
| Hannele Mattsson               | THL Biobank / Finnish Institute for Health and Welfare (THL), Helsinki, Finland                                                                                       | hannele.mattsson@thl.fi               | FinnGen Teams     | Registry Data Operations       |
| Kati Kristiansson              | THL Biobank / Finnish Institute for Health and Welfare (THL), Helsinki, Finland                                                                                       | kati.kristiansson@thl.fi              | FinnGen Teams     | Registry Data Operations       |
| Susanna Lemmelä                | Institute for Molecular Medicine Finland (FIMM), HiLIFE, University of Helsinki, Helsinki, Finland                                                                    | susanna.lemmela@helsinki.fi           | FinnGen Teams     | Registry Data Operations       |
| Sami Koskelainen               | THL Biobank / Finnish Institute for Health and Welfare (THL), Helsinki, Finland                                                                                       | sami.koskelainen@thl.fi               | FinnGen Teams     | Registry Data Operations       |
| Tero Hiekkalinna               | THL Biobank / Finnish Institute for Health and Welfare (THL), Helsinki, Finland                                                                                       | tero.hiekkalinna@helsinki.fi          | FinnGen Teams     | Registry Data Operations       |
| Teemu Paajanen                 | THL Biobank / Finnish Institute for Health and Welfare (THL), Helsinki, Finland                                                                                       | teemu.paajanen@thl.fi                 | FinnGen Teams     | Registry Data Operations       |
| Priit Palta                    | Institute for Molecular Medicine Finland (FIMM), HiLIFE, University of Helsinki, Helsinki, Finland                                                                    | priit.palta@helsinki.fi               | FinnGen Teams     | Sequencing Informatics         |
| Kalle Pärn                     | Institute for Molecular Medicine Finland (FIMM), HiLIFE, University of Helsinki, Helsinki, Finland                                                                    | kalle.parn@helsinki.fi                | FinnGen Teams     | Sequencing Informatics         |
| Mart Kals                      | Institute for Molecular Medicine Finland (FIMM), HiLIFE, University of Helsinki, Helsinki, Finland                                                                    | mart.kals@helsinki.fi                 | FinnGen Teams     | Sequencing Informatics         |
| Shuang Luo                     | Institute for Molecular Medicine Finland (FIMM), HiLIFE, University of Helsinki, Helsinki, Finland                                                                    | shuang.luo@helsinki.fi                | FinnGen Teams     | Sequencing Informatics         |
| Tarja Laitinen                 | Pirkanmaa Hospital District, Tampere, Finland                                                                                                                         | tarja.laitinen@pshp.fi                | FinnGen Teams     | Trajectory                     |
| Mary Pat Reeve                 | Institute for Molecular Medicine Finland (FIMM), HiLIFE, University of Helsinki, Helsinki, Finland                                                                    | mary.reeve@helsinki.fi                | FinnGen Teams     | Trajectory                     |
| Shanmukha Sampath Padmanabhuni | Institute for Molecular Medicine Finland (FIMM), HiLIFE, University of Helsinki, Helsinki, Finland                                                                    | sam.padmanabhuni@helsinki.fi          | FinnGen Teams     | Trajectory                     |
| Marianna Niemi                 | University of Tampere, Tampere, Finland                                                                                                                               | marianna.niemi@tuni.fi                | FinnGen Teams     | Trajectory                     |
| Harri Siirtola                 | University of Tampere, Tampere, Finland                                                                                                                               | harri.siirtola@tuni.fi                | FinnGen Teams     | Trajectory                     |

|                       |                                                                                                    |                              |               |                                     |
|-----------------------|----------------------------------------------------------------------------------------------------|------------------------------|---------------|-------------------------------------|
| Javier Gracia-Tabuena | University of Tampere, Tampere, Finland                                                            | javier.graciatabuena@tuni.fi | FinnGen Teams | Trajectory                          |
| Mika Helminen         | University of Tampere, Tampere, Finland                                                            | mika.helminen@tuni.fi        | FinnGen Teams | Trajectory                          |
| Tiina Luukkaala       | University of Tampere, Tampere, Finland                                                            | tiina.luukkaala@tuni.fi      | FinnGen Teams | Trajectory                          |
| Iida Vähätalo         | University of Tampere, Tampere, Finland                                                            | iida.vahatalo@epsnp.fi       | FinnGen Teams | Trajectory                          |
| Jyrki Pitkanen        | Institute for Molecular Medicine Finland (FIMM), HiLIFE, University of Helsinki, Helsinki, Finland | jyrki.pitkanen@helsinki.fi   | FinnGen Teams | Data protection officer             |
| Marco Hautalahti      | Finnish Biobank Cooperative - FINBB                                                                | marco.hautalahti@finbb.fi    | FinnGen Teams | FINBB - Finnish biobank cooperative |
| Johanna Mäkelä        | Finnish Biobank Cooperative - FINBB                                                                | johanna.makela@finbb.fi      | FinnGen Teams | FINBB - Finnish biobank cooperative |
| Sarah Smith           | Finnish Biobank Cooperative - FINBB                                                                | sarah.smith@finbb.fi         | FinnGen Teams | FINBB - Finnish biobank cooperative |
| Tom Southerington     | Finnish Biobank Cooperative - FINBB                                                                | tom.southerington@finbb.fi   | FinnGen Teams | FINBB - Finnish biobank cooperative |
